# Supplementary material for: Endothelial cell-derived angiopoietin-like protein 2 supports hematopoietic stem cell activities in bone marrow niches
Source: PubMed Central journal article supplement — Blood. 2022 Mar 10;139(10):1529–40. doi: 10.1182/blood.2021011644 (PMC9015010; doi:10.1182/blood.2021011644), 2022-03-10
Supplement: bloodBLD2021011644-suppl1.pdf [file bloodBLD2021011644-suppl1.pdf]

**Table S1.** Primer sequences for genotyping and qRT-PCR.

| <b>Primers for genotyping</b> | <b>Sequences</b>               |
|-------------------------------|--------------------------------|
| <i>Angptl2-loxp-tF</i>        | ATCCTAATGTCCCTCTTGGC           |
| <i>Angptl2-FRT-tR</i>         | CAGGCTGTGAACAGGTTAGTCATC       |
| <i>Prx1-Cre-F</i>             | AGG GGG TCT GTA AAA CGT CA     |
| <i>Prx1-Cre-R</i>             | GTA CGG TCA GTA AAT TGG ACA CC |
| <i>Pf4-Cre-F</i>              | CCCATACAGCACACCTTTTG           |
| <i>Pf4-Cre-R</i>              | TGCACAGTCAGCAGGTT              |
| <i>Cdh5-Cre-F</i>             | ATGTCCAATTTACTGACCGTACA        |
| <i>Cdh5-Cre-R</i>             | CGCATAACCAGTGAAACAGCATT        |
| <i>Tie2-Cre-F</i>             | ATTTGCCTGCATTACCGGTC           |
| <i>Tie2-Cre-R</i>             | ATCAACGTTTTCTTTTCGG            |
| <b>Primers for qRT-PCR</b>    | <b>Sequences</b>               |
| Mouse- <i>Angptl2</i> -F      | CCACCTCGGGTCTACCAAC            |
| Mouse- <i>Angptl2</i> -R      | CTTGCAGGCAGTCTCTCCAT           |
| Mouse- <i>PPARd</i> -F        | TTCAGAAATGCCTTGCAGTG           |
| Mouse- <i>PPARd</i> -R        | GGACTCTGGATTCAGCTGGT           |
| Mouse- <i>Rora</i> -F         | GTGGAGACAAATCGTCAGGAAT         |
| Mouse- <i>Rora</i> -R         | TGGTCCGATCAATCAAACAGTTC        |
| Mouse- <i>Rab20</i> -F        | GGGAGCAGTTTCATGGTCTGG          |
| Mouse- <i>Rab20</i> -R        | GCAGTCATTGTTGGCTGTTTC          |
| Mouse- <i>Pik3r2</i> -F       | GGATGCCTGGCTTCAACGA            |
| Mouse- <i>Pik3r2</i> -R       | CTGGGAGTATGTGGCCTGACT          |
| Mouse- <i>Isg15</i> -F        | GGTGTCCGTGACTAACTCCAT          |
| Mouse- <i>Isg15</i> -R        | TGGAAAGGGTAAGACCGTCCT          |
| Mouse- <i>G0s2</i> -F         | GTGCTCGGCCTAGTTGAGAC           |
| Mouse- <i>G0s2</i> -R         | CACCTGGGTCATGATCTGTG           |
| Mouse- <i>CD49d</i> -F        | GATGCTGTTGTTGTACTIONCGGG       |
| Mouse- <i>CD49d</i> -R        | ACCACTGAGGCATTAGAGAGC          |
| Mouse- <i>Egr1</i> -F         | TCGGCTCCTTTCCTCACTCA           |
| Mouse- <i>Egr1</i> -R         | CTCATAGGGTTGTTTCGCTCGG         |
| Mouse- <i>Mmp2</i> -F         | CAAGTTCCCCGGCGATGTC            |
| Mouse- <i>Mmp2</i> -R         | TTCTGGTCAAGGTCACCTGTC          |
| Mouse- <i>Mmp9</i> -F         | CTGGACAGCCAGACACTAAAG          |
| Mouse- <i>Mmp9</i> -R         | CTCGCGCAAGTCTTCAGAG            |

**Table S2. The list of differentially expressed gene**

| GeneID          | GeneName         | Locus     | CTRL_FPKM | A2_FPKM  | log2(A2/CTRL) | up-or-down         | p_value  | q_value  |
|-----------------|------------------|-----------|-----------|----------|---------------|--------------------|----------|----------|
| ENSG00000271590 | RP11-181E10.3    | 2:1111959 | 0.551329  |          | 0             | -1.79769e+30f down | 0.000119 | 0.003742 |
| ENSG00000251660 | AC007036.5       | 7:3013480 | 0.923752  |          | 0             | -1.79769e+30f down | 0.004509 | 0.047583 |
| ENSG00000260583 | AP000223.42      | 21:255827 | 0.726751  |          | 0             | -1.79769e+30f down | 0.004075 | 0.044865 |
| ENSG00000226318 | RPS3AP38         | 10:679218 | 1.1102    |          | 0             | -1.79769e+30f down | 0.000242 | 0.006469 |
| ENSG00000261312 | AC002550.5       | 16:195552 | 0.946634  |          | 0             | -1.79769e+30f down | 0.000139 | 0.004178 |
| ENSG00000260570 | RP11-24N18.1     | 16:288224 | 3.91865   |          | 0             | -1.79769e+30f down | 0.002153 | 0.029306 |
| ENSG00000272498 | RP11-415F23.3    | 3:1626515 | 0.855397  |          | 0             | -1.79769e+30f down | 0.002157 | 0.029306 |
| ENSG00000188223 | AC002398.9       | 19:357180 | 0.506095  |          | 0             | -1.79769e+30f down | 0.001617 | 0.024356 |
| ENSG00000267343 | ZNF833P          | 19:116397 | 0.790099  |          | 0             | -1.79769e+30f down | 4.09E-06 | 0.000302 |
| ENSG00000283241 | AC026348.1       | 3:1132110 | 0.499048  |          | 0             | -1.79769e+30f down | 1.29E-09 | 4.26E-07 |
| ENSG00000270096 | RP11-362K14.6    | 3:1697934 | 0.964971  |          | 0             | -1.79769e+30f down | 0.000889 | 0.016082 |
| ENSG00000250309 | CTC-345K18.2     | 5:1506608 | 1.13775   |          | 0             | -1.79769e+30f down | 0.00045  | 0.010212 |
| ENSG00000254528 | RP11-728F11.4    | 11:117427 | 0.504466  |          | 0             | -1.79769e+30f down | 0.004143 | 0.045324 |
| ENSG00000267655 | CTD-2286N8.2     | 18:790692 | 0.719614  |          | 0             | -1.79769e+30f down | 0.003619 | 0.04173  |
| ENSG00000279415 | RP11-1102P22.1   | 16:171017 | 0.930019  |          | 0             | -1.79769e+30f down | 8.81E-05 | 0.003052 |
| ENSG00000256928 | RP11-809N8.2     | 11:733762 | 1.73927   |          | 0             | -1.79769e+30f down | 8.20E-06 | 0.000505 |
| ENSG00000259185 | RP11-56B16.4     | 15:518296 | 2.15938   |          | 0             | -1.79769e+30f down | 0.000427 | 0.009859 |
| ENSG00000254673 | RP11-598P20.5    | 8:4284963 | 1.01374   |          | 0             | -1.79769e+30f down | 0.003436 | 0.040377 |
| ENSG00000142511 | GPR32            | 19:507704 |           | 0        | 0.613931      | 1.79769e+308 up    | 0.000266 | 0.006851 |
| ENSG00000248919 | ATP5J2-PTCD1     | 7:9932589 |           | 0        | 1.01094       | 1.79769e+308 up    | 9.13E-08 | 1.43E-05 |
| ENSG00000228170 | RP1-40E16.11     | 6:3118373 |           | 0        | 1.26287       | 1.79769e+308 up    | 0.001311 | 0.021007 |
| ENSG00000260914 | RP11-343C2.11    | 16:691055 |           | 0        | 4.60886       | 1.79769e+308 up    | 4.94E-12 | 4.28E-09 |
| ENSG00000277957 | SEN3-EIF4A1      | 17:756187 |           | 0        | 0.689481      | 1.79769e+308 up    | 5.16E-07 | 5.31E-05 |
| ENSG00000273331 | TM4SF19-TCTEX1D2 | 3:1962114 |           | 0        | 0.743669      | 1.79769e+308 up    | 0.004373 | 0.046848 |
| ENSG00000266923 | RP11-693J15.4    | 12:924200 |           | 0        | 0.589533      | 1.79769e+308 up    | 5.23E-05 | 0.002031 |
| ENSG00000256249 | RP11-324E6.6     | 12:122687 |           | 0        | 0.638206      | 1.79769e+308 up    | 0.000823 | 0.015137 |
| ENSG00000107159 | CA9              | 9:3565828 |           | 0        | 0.727885      | 1.79769e+308 up    | 0.000915 | 0.016349 |
| ENSG00000185345 | PARK2            | 6:1613474 | 0.0640323 | 2.06567  |               | 5.01166 up         | 1.05E-06 | 9.26E-05 |
| ENSG00000123689 | G0S2             | 1:2096613 | 0.115794  | 1.57297  |               | 3.76386 up         | 0.000147 | 0.00437  |
| ENSG00000231475 | IGHV4-31         | 14:106349 | 0.268864  | 2.44689  |               | 3.186 up           | 0.003235 | 0.038741 |
| ENSG00000105697 | HAMP             | 19:352807 | 0.165958  | 1.44134  |               | 3.11852 up         | 0.002082 | 0.028576 |
| ENSG00000128656 | CHN1             | 2:1747993 | 0.0862273 | 0.708295 |               | 3.03813 up         | 0.000301 | 0.007495 |
| ENSG00000134827 | TCN1             | 11:598527 | 0.20974   | 1.50854  |               | 2.84648 up         | 0.000121 | 0.003756 |
| ENSG00000088827 | SIGLEC1          | 20:368696 | 0.275743  | 1.72356  |               | 2.644 up           | 0        | 0        |
| ENSG00000152467 | ZSCAN1           | 19:580340 | 0.198722  | 1.21557  |               | 2.61281 up         | 0.000376 | 0.008965 |
| ENSG00000163735 | CXCL5            | 4:7399564 | 0.213851  | 1.28205  |               | 2.58378 up         | 1.46E-06 | 0.000123 |
| ENSG00000105647 | PIK3R2           | 19:181531 | 0.937232  | 5.56827  |               | 2.57075 up         | 1.38E-14 | 2.38E-11 |
| ENSG00000124102 | PI3              | 20:451748 | 0.440791  | 2.37423  |               | 2.42929 up         | 0.000644 | 0.01264  |
| ENSG00000171657 | GPR82            | X:4151493 | 0.154171  | 0.816395 |               | 2.40473 up         | 0.002498 | 0.03225  |
| ENSG00000277232 | GTSE1-AS1        | 22:462951 | 0.26078   | 1.28606  |               | 2.30206 up         | 0.00093  | 0.016478 |
| ENSG00000229413 | RP11-274B21.12   | 7:1286536 | 0.724886  | 3.55371  |               | 2.2935 up          | 0.004227 | 0.046015 |
| ENSG00000108691 | CCL2             | 17:342552 | 6.35265   | 28.6042  |               | 2.1708 up          | 0        | 0        |
| ENSG00000157601 | MX1              | 21:414203 | 2.51541   | 11.0107  |               | 2.13004 up         | 0        | 0        |
| ENSG00000283590 | NDOR1            | 9:1372056 | 0.311921  | 1.32308  |               | 2.08465 up         | 0.000528 | 0.011284 |
| ENSG00000014914 | MTMR11           | 1:1499286 | 0.280052  | 1.1454   |               | 2.03209 up         | 0.001145 | 0.019055 |
| ENSG00000262406 | MMP12            | 11:102862 | 0.806775  | 3.1183   |               | 1.95052 up         | 1.68E-08 | 3.72E-06 |
| ENSG00000254402 | LRRC24           | 8:1445179 | 0.209151  | 0.726725 |               | 1.79687 up         | 0.002276 | 0.030429 |
| ENSG00000100122 | CRYBB1           | 22:265992 | 0.241642  | 0.837022 |               | 1.79239 up         | 0.004418 | 0.047098 |
| ENSG00000275185 | RP13-753N3.3     | 17:308973 | 1.36775   | 4.63736  |               | 1.7615 up          | 0.003103 | 0.037447 |
| ENSG00000261459 | AC002310.11      | 16:305240 | 0.45515   | 1.51789  |               | 1.73766 up         | 9.27E-05 | 0.003127 |
| ENSG00000259112 | NDUFC2-KCTD14    | 11:780157 | 3.39421   | 11.168   |               | 1.71823 up         | 1.70E-06 | 0.000139 |
| ENSG00000267598 | CTC-250I14.6     | 19:131504 | 1.15052   | 3.69481  |               | 1.68322 up         | 0.000619 | 0.012374 |
| ENSG00000272540 | XXbac-BPG252P9.9 | 6:3072020 | 1.45776   | 4.64034  |               | 1.67048 up         | 0.000477 | 0.010661 |
| ENSG00000133424 | LARGE1           | 22:331622 | 0.35596   | 1.12731  |               | 1.6631 up          | 0.001369 | 0.02175  |
| ENSG00000250021 | C15orf38-AP3S2   | 15:898305 | 0.89885   | 2.76817  |               | 1.62278 up         | 4.62E-05 | 0.001851 |
| ENSG00000205927 | OLIG2            | 21:329136 | 0.322656  | 0.98389  |               | 1.6085 up          | 7.24E-06 | 0.000473 |
| ENSG00000137959 | IFI44L           | 1:7861992 | 1.37449   | 4.16708  |               | 1.60015 up         | 7.13E-07 | 6.97E-05 |
| ENSG00000225783 | MIAT             | 22:266464 | 0.32039   | 0.969426 |               | 1.5973 up          | 1.15E-05 | 0.000668 |
| ENSG00000105352 | CEACAM4          | 19:416189 | 1.30371   | 3.93029  |               | 1.59202 up         | 5.10E-07 | 5.31E-05 |
| ENSG00000274012 | RN7SL2           | 14:498611 | 18.078    | 51.5685  |               | 1.51226 up         | 9.58E-11 | 5.51E-08 |
| ENSG00000276085 | CCL3L3           | 17:361832 | 1.84248   | 5.24933  |               | 1.51048 up         | 3.69E-07 | 4.25E-05 |
| ENSG00000130589 | HELZ2            | 20:635580 | 1.3346    | 3.6928   |               | 1.46831 up         | 1.35E-10 | 7.01E-08 |
| ENSG00000163739 | CXCL1            | 4:7386939 | 0.516566  | 1.39353  |               | 1.43172 up         | 0.004081 | 0.044877 |
| ENSG00000131471 | AOC3             | 17:428511 | 0.213279  | 0.573098 |               | 1.42604 up         | 0.004705 | 0.0488   |
| ENSG00000257553 | RP11-603J24.17   | 12:560798 | 2.51916   | 6.75633  |               | 1.4233 up          | 0.001572 | 0.02388  |
| ENSG00000122035 | RASL11A          | 13:272703 | 0.547983  | 1.45768  |               | 1.41147 up         | 0.003979 | 0.044085 |
| ENSG00000139899 | CBLN3            | 14:244265 | 0.361797  | 0.938307 |               | 1.37488 up         | 0.000517 | 0.011149 |
| ENSG00000136689 | IL1RN            | 2:1131072 | 25.41     | 64.5756  |               | 1.34559 up         | 0        | 0        |
| ENSG00000260257 | RP5-1085F17.3    | 20:328566 | 1.51331   | 3.84319  |               | 1.34459 up         | 7.75E-06 | 0.000495 |
| ENSG00000111012 | CYP27B1          | 12:577623 | 1.07949   | 2.74016  |               | 1.34392 up         | 0.000121 | 0.003756 |
| ENSG00000161939 | RNASEK-C17orf49  | 17:685386 | 2.16612   | 5.44244  |               | 1.32914 up         | 9.00E-05 | 0.00308  |

|                 |                |                 |          |          |          |      |          |          |
|-----------------|----------------|-----------------|----------|----------|----------|------|----------|----------|
| ENSG00000122641 | INHBA          | 7:4166716       | 0.321298 | 0.794889 | 1.30684  | up   | 8.87E-05 | 0.003056 |
| ENSG00000129038 | LOXL1          | 15:739080       | 0.997365 | 2.39421  | 1.26336  | up   | 0.000101 | 0.003307 |
| ENSG00000198483 | ANKRD35        | 1:1458665       | 0.286955 | 0.68113  | 1.24711  | up   | 0.000821 | 0.01513  |
| ENSG00000158406 | HIST1H4H       | 6:2627760       | 1.58014  | 3.73305  | 1.2403   | up   | 0.002881 | 0.035519 |
| ENSG00000173451 | THAP2          | 12:716094       | 1.27078  | 2.98502  | 1.23203  | up   | 0.000571 | 0.011804 |
| ENSG00000231789 | PIK3CD-AS2     | 1:9651731       | 0.912205 | 2.12224  | 1.21816  | up   | 0.001988 | 0.027793 |
| ENSG00000050730 | TNIP3          | 4:1211314       | 0.894563 | 2.0606   | 1.20381  | up   | 0.00012  | 0.003756 |
| ENSG00000135119 | RNFT2          | 12:116738       | 0.683773 | 1.56213  | 1.19192  | up   | 0.001676 | 0.024961 |
| ENSG00000280106 | CTC-523E23.3   | 19:349490       | 1.40725  | 3.19563  | 1.18322  | up   | 0.000398 | 0.009325 |
| ENSG00000267757 | EML2-AS1       | 19:456069       | 1.14246  | 2.57513  | 1.17251  | up   | 0.004358 | 0.046763 |
| ENSG00000126709 | IFI6           | 1:2766606       | 16.7977  | 37.658   | 1.1647   | up   | 1.76E-12 | 1.83E-09 |
| ENSG00000187608 | ISG15          | 1:1001137       | 11.352   | 25.3487  | 1.15897  | up   | 1.89E-08 | 4.07E-06 |
| ENSG00000186395 | KRT10          | 17:408181       | 2.70924  | 6.00812  | 1.14903  | up   | 1.05E-06 | 9.26E-05 |
| ENSG00000275713 | HIST1H2BH      | 6:2625165       | 0.809919 | 1.79021  | 1.14428  | up   | 0.001132 | 0.018984 |
| ENSG00000173926 |                | 3-Mar 5:1268677 | 1.76415  | 3.87937  | 1.13685  | up   | 0.000279 | 0.007076 |
| ENSG00000105699 | LSR            | 19:352483       | 0.815273 | 1.75085  | 1.1027   | up   | 0.003965 | 0.04402  |
| ENSG00000110079 | MS4A4A         | 11:602805       | 2.87826  | 6.08108  | 1.07913  | up   | 1.94E-05 | 0.000975 |
| ENSG00000185507 | IRF7           | 11:612552       | 6.26489  | 13.2329  | 1.07877  | up   | 1.02E-14 | 1.98E-11 |
| ENSG00000279443 | RP4-669K10.8   | 1:2854445       | 0.709833 | 1.47063  | 1.05088  | up   | 0.003719 | 0.042379 |
| ENSG00000139832 | RAB20          | 13:110523       | 2.07201  | 4.2773   | 1.04567  | up   | 3.68E-05 | 0.001533 |
| ENSG00000102890 | ELMO3          | 16:671991       | 0.990349 | 2.02478  | 1.03176  | up   | 0.000324 | 0.008009 |
| ENSG00000167680 | SEMA6B         | 19:454259       | 0.512044 | 1.04589  | 1.0304   | up   | 0.00027  | 0.006939 |
| ENSG00000221955 | SLC12A8        | 3:1250826       | 1.46141  | 2.97351  | 1.02481  | up   | 5.80E-05 | 0.00219  |
| ENSG00000222009 | BTBD19         | 1:4480848       | 1.04788  | 2.09995  | 1.00288  | up   | 0.00431  | 0.046617 |
| ENSG00000150627 | WDR17          | 4:1760658       | 3.95605  | 1.97721  | -1.00059 | down | 5.83E-06 | 0.000396 |
| ENSG00000215447 | BX322557.10    | 21:452880       | 2.6021   | 1.29782  | -1.00358 | down | 0.002488 | 0.032183 |
| ENSG00000156011 | PSD3           | 8:1852730       | 3.03748  | 1.51477  | -1.00378 | down | 8.55E-05 | 0.002985 |
| ENSG00000282827 | ATRIP          | 3:4844670       | 5.25776  | 2.6128   | -1.00885 | down | 7.09E-07 | 6.97E-05 |
| ENSG00000205885 | C1RL-AS1       | 12:708020       | 4.42729  | 2.14869  | -1.04297 | down | 0.002415 | 0.031578 |
| ENSG00000170006 | TMEM154        | 4:1526186       | 4.44741  | 2.11452  | -1.07263 | down | 6.25E-05 | 0.002322 |
| ENSG00000133138 | TBC1D8B        | X:1068026       | 1.79942  | 0.849793 | -1.08235 | down | 0.000562 | 0.011652 |
| ENSG00000154874 | CCDC144B       | 17:185112       | 3.19356  | 1.46857  | -1.12076 | down | 0.000212 | 0.005892 |
| ENSG00000213865 | C8orf44        | 8:6666759       | 3.27189  | 1.49996  | -1.1252  | down | 0.000747 | 0.01406  |
| ENSG00000258461 | RP11-164J13.1  | 15:422084       | 1.82498  | 0.832976 | -1.13153 | down | 2.49E-05 | 0.001155 |
| ENSG00000278811 | LINC00624      | 1:1471727       | 0.936222 | 0.426252 | -1.13514 | down | 0.002088 | 0.028595 |
| ENSG00000163625 | WDFY3          | 4:8466960       | 5.58145  | 2.53212  | -1.1403  | down | 9.35E-08 | 1.44E-05 |
| ENSG00000144935 | TRPC1          | 3:1427240       | 1.67021  | 0.755465 | -1.1446  | down | 0.004573 | 0.048008 |
| ENSG00000261684 | RP11-265N6.1   | 15:424912       | 6.41714  | 2.87445  | -1.15865 | down | 0.003882 | 0.043634 |
| ENSG00000224186 | C5orf66        | 5:1350277       | 4.84448  | 2.16723  | -1.16049 | down | 1.63E-05 | 0.000877 |
| ENSG00000182389 | CACNB4         | 2:1517889       | 0.948596 | 0.421918 | -1.16883 | down | 0.001967 | 0.027628 |
| ENSG00000280046 | RP11-1099M24.6 | 17:785668       | 1.93125  | 0.854651 | -1.17613 | down | 9.86E-06 | 0.000594 |
| ENSG00000272760 | RP11-5C23.1    | 7:1549284       | 3.02926  | 1.32563  | -1.19229 | down | 0.003839 | 0.043202 |
| ENSG00000134297 | PLEKHA8P1      | 12:451730       | 3.8208   | 1.65302  | -1.20877 | down | 0.002379 | 0.031389 |
| ENSG00000070087 | PFN2           | 3:1497611       | 1.60886  | 0.693904 | -1.21323 | down | 0.002629 | 0.033394 |
| ENSG00000145075 | CCDC39         | 3:1806021       | 0.931952 | 0.400456 | -1.21861 | down | 0.000258 | 0.006757 |
| ENSG00000258559 | AC005519.4     | 14:742854       | 1.97859  | 0.845551 | -1.22651 | down | 0.002652 | 0.033498 |
| ENSG00000148483 | TMEM236        | 10:177522       | 0.510558 | 0.216766 | -1.23594 | down | 0.003314 | 0.039411 |
| ENSG00000249087 | ZNF436-AS1     | 1:2335944       | 0.826194 | 0.344482 | -1.26205 | down | 0.003127 | 0.037636 |
| ENSG00000122254 | HS3ST2         | 16:228141       | 0.825039 | 0.34363  | -1.26361 | down | 0.00188  | 0.026767 |
| ENSG00000187554 | TLR5           | 1:2231094       | 1.17664  | 0.489511 | -1.26527 | down | 0.000558 | 0.011593 |
| ENSG00000157429 | RNF19          | 16:714475       | 1.17282  | 0.478933 | -1.29208 | down | 0.003001 | 0.03668  |
| ENSG00000279767 | AL513523.2     | 1:1537280       | 5.55705  | 2.14665  | -1.37223 | down | 0.000133 | 0.004061 |
| ENSG00000165115 | KIF27          | 9:8382965       | 2.49388  | 0.949272 | -1.3935  | down | 5.51E-07 | 5.59E-05 |
| ENSG00000230590 | FTX            | X:7394432       | 3.3519   | 1.25847  | -1.4133  | down | 0.001017 | 0.017494 |
| ENSG00000147231 | CXorf57        | X:1066119       | 1.25274  | 0.469986 | -1.4144  | down | 0.002967 | 0.036286 |
| ENSG00000149054 | ZNF215         | 11:682194       | 1.1653   | 0.434366 | -1.42372 | down | 0.00433  | 0.046645 |
| ENSG00000179240 | RP11-111M22.2  | 11:763813       | 2.79909  | 1.0383   | -1.43073 | down | 1.23E-05 | 0.000708 |
| ENSG00000069667 | RORA           | 15:604791       | 1.59953  | 0.588331 | -1.44295 | down | 4.86E-06 | 0.000344 |
| ENSG00000189144 | ZNF573         | 19:377358       | 2.47291  | 0.891586 | -1.47176 | down | 0.002841 | 0.035227 |
| ENSG00000100154 | TTC28          | 22:278516       | 3.46701  | 1.19254  | -1.53965 | down | 3.82E-10 | 1.48E-07 |
| ENSG00000009694 | TENM1          | X:1239592       | 0.681777 | 0.231028 | -1.56123 | down | 0.002572 | 0.032927 |
| ENSG00000279576 | AP000769.1     | 11:654977       | 5.93931  | 1.9336   | -1.61901 | down | 4.00E-05 | 0.001651 |
| ENSG00000272367 | CTC-428H11.2   | 5:8726788       | 2.62421  | 0.843928 | -1.63669 | down | 0.004275 | 0.046335 |
| ENSG00000155962 | CLIC2          | X:1552762       | 1.05847  | 0.33902  | -1.64253 | down | 0.000647 | 0.012652 |
| ENSG00000163464 | CXCR1          | 2:2181628       | 0.616076 | 0.190665 | -1.69207 | down | 0.003534 | 0.041093 |
| ENSG00000283467 | AL078584.1     | 6:2479732       | 1.35349  | 0.406129 | -1.73668 | down | 0.001235 | 0.020219 |
| ENSG00000259205 | PRKXP1         | 15:100553       | 1.29425  | 0.387793 | -1.73876 | down | 0.002063 | 0.028465 |
| ENSG00000279192 | PWAR5          | 15:248236       | 2.14662  | 0.627427 | -1.77455 | down | 5.10E-07 | 5.31E-05 |
| ENSG00000174501 | ANKRD36C       | 2:9583691       | 7.21993  | 2.09447  | -1.7854  | down | 6.81E-12 | 5.03E-09 |
| ENSG00000215158 | RP11-1023L17.1 | 5:3416469       | 6.49359  | 1.87627  | -1.79115 | down | 2.26E-07 | 2.79E-05 |
| ENSG00000215630 | GUSBP9         | 5:7119764       | 2.45158  | 0.682042 | -1.84578 | down | 0.004538 | 0.047821 |
| ENSG00000184566 | RP13-786C16.1  | 11:338585       | 1.43556  | 0.388511 | -1.88558 | down | 0.003452 | 0.040501 |

|                 |               |           |          |          |          |      |          |          |
|-----------------|---------------|-----------|----------|----------|----------|------|----------|----------|
| ENSG00000279500 | RP11-21K12.2  | 12:128793 | 1.42718  | 0.368813 | -1.9522  | down | 0.000508 | 0.011003 |
| ENSG00000281195 | ZNF638-IT1    | 2:7127656 | 1.17209  | 0.295956 | -1.98563 | down | 0.004337 | 0.046648 |
| ENSG00000196876 | SCN8A         | 12:515902 | 0.816187 | 0.199038 | -2.03585 | down | 0.000922 | 0.01639  |
| ENSG00000279390 | AF127577.13   | 21:148188 | 1.40601  | 0.336626 | -2.06239 | down | 5.09E-05 | 0.001981 |
| ENSG00000156113 | KCNMA1        | 10:768696 | 0.620525 | 0.144481 | -2.10261 | down | 0.000856 | 0.015632 |
| ENSG00000279456 | RP11-87H9.5   | 9:4099224 | 1.2326   | 0.285048 | -2.11242 | down | 0.000789 | 0.014676 |
| ENSG00000279041 | CTD-2373N4.3  | 8:3038211 | 0.937683 | 0.199048 | -2.23598 | down | 0.002877 | 0.035495 |
| ENSG00000213240 | RP11-458D21.5 | 1:1460646 | 0.49666  | 0.099484 | -2.31972 | down | 0.002616 | 0.033282 |
| ENSG00000279530 | AC092881.1    | 12:697386 | 0.941205 | 0.186367 | -2.33636 | down | 0.000636 | 0.012555 |
| ENSG00000261604 | CTD-2636A23.2 | 5:4328760 | 1.4528   | 0.255767 | -2.50594 | down | 5.25E-05 | 0.002034 |
| ENSG00000214262 | ANKRD36BP1    | 1:1682259 | 2.09186  | 0.326527 | -2.67951 | down | 0.00039  | 0.009172 |
| ENSG00000251201 | TMED7-TICAM2  | 5:1155786 | 0.92002  | 0.136447 | -2.75333 | down | 0.000224 | 0.006101 |
| ENSG00000261366 | MANEA-AS1     | 6:9557518 | 1.05895  | 0.154407 | -2.77783 | down | 0.000313 | 0.007754 |
| ENSG00000247228 | RP11-296I10.3 | 16:701136 | 1.58993  | 0.197523 | -3.00887 | down | 3.32E-05 | 0.001425 |
| ENSG00000229267 | AC072062.1    | 2:2148102 | 0.816714 | 0.100704 | -3.01971 | down | 0.002479 | 0.032116 |
| ENSG00000267500 | ZNF887P       | 19:116397 | 1.07164  | 0.115972 | -3.20797 | down | 0.001467 | 0.022757 |
| ENSG00000259024 | TVP23C-CDRT4  | 17:154360 | 1.18964  | 0.121987 | -3.28572 | down | 0.004808 | 0.049586 |
| ENSG00000177675 | CD163L1       | 12:734668 | 0.650257 | 0.060022 | -3.43745 | down | 0.001514 | 0.023306 |
| ENSG00000176927 | EFCAB5        | 17:295605 | 0.560929 | 0.047427 | -3.56403 | down | 0.00064  | 0.012593 |
| ENSG00000143248 | RGS5          | 1:1631111 | 0.736425 | 0.059732 | -3.62397 | down | 3.33E-05 | 0.001425 |
| ENSG00000261845 | RP13-638C3.4  | 17:825197 | 1.38393  | 0.099812 | -3.79342 | down | 0.004841 | 0.049794 |
| ENSG00000257411 | RP11-603J24.9 | 12:560798 | 5.36556  | 0.342108 | -3.97121 | down | 0.002784 | 0.034735 |
| ENSG00000232104 | RFX3-AS1      | 9:3526722 | 1.14708  | 0.054351 | -4.39952 | down | 0.003353 | 0.039789 |
| ENSG00000103888 | CEMIP         | 15:807793 | 0.598823 | 0.026877 | -4.47771 | down | 0.000157 | 0.004619 |

### Table S3. The list of pathway enrichment analysis

| #Pathway                                                   | Sample1 (49) | Sample2 (12412) | Pvalue  | Qvalue  | Pathway ID | Genes                                                                           | KOs                                |
|------------------------------------------------------------|--------------|-----------------|---------|---------|------------|---------------------------------------------------------------------------------|------------------------------------|
| Chemokine signaling pathway                                | 5            | 178             | 0.00066 | 0.06233 | ko04062    | ENSG00000105647;ENSG00000163739;ENSG00000163735;ENSG00000163464;ENSG00000108691 | K02649+K05505+K05506+K04175+K14624 |
| Cytokine-cytokine receptor interaction                     | 5            | 263             | 0.00366 | 0.13891 | ko04060    | ENSG00000122641;ENSG00000163739;ENSG00000163735;ENSG00000163464;ENSG00000108691 | K04667+K05505+K05506+K04175+K14624 |
| Rheumatoid arthritis                                       | 3            | 91              | 0.00551 | 0.13891 | ko05323    | ENSG00000163739;ENSG00000163735;ENSG00000108691                                 | K05505+K05506+K14624               |
| Salmonella infection                                       | 3            | 93              | 0.00585 | 0.13891 | ko05132    | ENSG00000187554;ENSG00000163739;ENSG00000070087                                 | K10168+K05505+K05759               |
| Pancreatic secretion                                       | 3            | 107             | 0.00861 | 0.16356 | ko04972    | ENSG00000144935;ENSG00000156113;ENSG00000107159                                 | K04964+K04936+K01672               |
| Legionellosis                                              | 2            | 58              | 0.02193 | 0.29761 | ko05134    | ENSG00000187554;ENSG00000163739                                                 | K10168+K05505                      |
| NOD-like receptor signaling pathway                        | 2            | 58              | 0.02193 | 0.29761 | ko04621    | ENSG00000163739;ENSG00000108691                                                 | K05505+K14624                      |
| Epithelial cell signaling in Helicobacter pylori infection | 2            | 70              | 0.0311  | 0.32894 | ko05120    | ENSG00000163739;ENSG00000163464                                                 | K05505+K04175                      |
| Influenza A                                                | 3            | 174             | 0.03116 | 0.32894 | ko05164    | ENSG00000157601;ENSG00000105647;ENSG00000108691                                 | K14754+K02649+K14624               |
| Pathogenic Escherichia coli infection                      | 2            | 101             | 0.06023 | 0.43555 | ko05130    | ENSG00000186395;ENSG00000187554                                                 | K07604+K10168                      |
| Amoebiasis                                                 | 2            | 103             | 0.06234 | 0.43555 | ko05146    | ENSG00000105647;ENSG00000163739                                                 | K02649+K05505                      |
| Chagas disease (American trypanosomiasis)                  | 2            | 104             | 0.06341 | 0.43555 | ko05142    | ENSG00000105647;ENSG00000108691                                                 | K02649+K14624                      |
| Toll-like receptor signaling pathway                       | 2            | 105             | 0.06448 | 0.43555 | ko04620    | ENSG00000105647;ENSG00000187554                                                 | K02649+K10168                      |
| Phenylalanine metabolism                                   | 1            | 18              | 0.06877 | 0.43555 | ko00360    | ENSG00000131471                                                                 | K00276                             |
| Steroid biosynthesis                                       | 1            | 18              | 0.06877 | 0.43555 | ko00100    | ENSG00000111012                                                                 | K07438                             |
| Parkinson's disease                                        | 2            | 118             | 0.07896 | 0.45917 | ko05012    | ENSG00000259112;ENSG00000185345                                                 | K03968+K04556                      |
| Circadian rhythm - mammal                                  | 1            | 22              | 0.08341 | 0.45917 | ko04710    | ENSG00000069667                                                                 | K08532                             |
| Measles                                                    | 2            | 133             | 0.09679 | 0.45917 | ko05162    | ENSG00000157601;ENSG00000105647                                                 | K14754+K02649                      |
| Glycosaminoglycan biosynthesis - heparan sulfate           | 1            | 26              | 0.09783 | 0.45917 | ko00534    | ENSG00000122254                                                                 | K07808                             |
| Systemic lupus erythematosus                               | 2            | 135             | 0.09925 | 0.45917 | ko05322    | ENSG00000158406;ENSG00000275713                                                 | K11254+K11252                      |
| beta-Alanine metabolism                                    | 1            | 31              | 0.11554 | 0.45917 | ko00410    | ENSG00000131471                                                                 | K00276                             |
| Proximal tubule bicarbonate reclamation                    | 1            | 32              | 0.11904 | 0.45917 | ko04964    | ENSG00000107159                                                                 | K01672                             |
| Tyrosine metabolism                                        | 1            | 37              | 0.13634 | 0.45917 | ko00350    | ENSG00000131471                                                                 | K00276                             |
| Collecting duct acid secretion                             | 1            | 37              | 0.13634 | 0.45917 | ko04966    | ENSG00000107159                                                                 | K01672                             |
| Aldosterone-regulated sodium reabsorption                  | 1            | 37              | 0.13634 | 0.45917 | ko04960    | ENSG00000105647                                                                 | K02649                             |
| Glycine, serine and threonine metabolism                   | 1            | 37              | 0.13634 | 0.45917 | ko00260    | ENSG00000131471                                                                 | K00276                             |
| Alcoholism                                                 | 2            | 179             | 0.15715 | 0.45917 | ko05034    | ENSG00000158406;ENSG00000275713                                                 | K11254+K11252                      |
| Type II diabetes mellitus                                  | 1            | 45              | 0.16332 | 0.45917 | ko04930    | ENSG00000105647                                                                 | K02649                             |
| Malaria                                                    | 1            | 47              | 0.16994 | 0.45917 | ko05144    | ENSG00000108691                                                                 | K14624                             |
| mTOR signaling pathway                                     | 1            | 49              | 0.17651 | 0.45917 | ko04150    | ENSG00000105647                                                                 | K02649                             |
| Carbohydrate digestion and absorption                      | 1            | 50              | 0.17977 | 0.45917 | ko04973    | ENSG00000105647                                                                 | K02649                             |
| Fanconi anemia pathway                                     | 1            | 50              | 0.17977 | 0.45917 | ko03460    | ENSG00000282827                                                                 | K10905                             |
| Non-small cell lung cancer                                 | 1            | 51              | 0.18302 | 0.45917 | ko05223    | ENSG00000105647                                                                 | K02649                             |
| Endocytosis                                                | 2            | 199             | 0.18525 | 0.45917 | ko04144    | ENSG00000156011;ENSG00000163464                                                 | K12494+K04175                      |
| Endometrial cancer                                         | 1            | 52              | 0.18626 | 0.45917 | ko05213    | ENSG00000105647                                                                 | K02649                             |
| Acute myeloid leukemia                                     | 1            | 58              | 0.20543 | 0.45917 | ko05221    | ENSG00000105647                                                                 | K02649                             |
| Glioma                                                     | 1            | 58              | 0.20543 | 0.45917 | ko05214    | ENSG00000105647                                                                 | K02649                             |
| Regulation of actin cytoskeleton                           | 2            | 216             | 0.20967 | 0.45917 | ko04810    | ENSG00000105647;ENSG00000070087                                                 | K02649+K05759                      |
| Colorectal cancer                                          | 1            | 62              | 0.21796 | 0.45917 | ko05210    | ENSG00000105647                                                                 | K02649                             |
| VEGF signaling pathway                                     | 1            | 63              | 0.22107 | 0.45917 | ko04370    | ENSG00000105647                                                                 | K02649                             |
| Bacterial invasion of epithelial cells                     | 1            | 66              | 0.2303  | 0.45917 | ko05100    | ENSG00000105647                                                                 | K02649                             |
| Melanoma                                                   | 1            | 67              | 0.23336 | 0.45917 | ko05218    | ENSG00000105647                                                                 | K02649                             |
| Pancreatic cancer                                          | 1            | 67              | 0.23336 | 0.45917 | ko05212    | ENSG00000105647                                                                 | K02649                             |
| Renal cell carcinoma                                       | 1            | 68              | 0.2364  | 0.45917 | ko05211    | ENSG00000105647                                                                 | K02649                             |
| Shigellosis                                                | 1            | 68              | 0.2364  | 0.45917 | ko05131    | ENSG00000070087                                                                 | K05759                             |
| RIG-I-like receptor signaling pathway                      | 1            | 70              | 0.24245 | 0.45917 | ko04622    | ENSG00000187608                                                                 | K12159                             |
| Chronic myeloid leukemia                                   | 1            | 70              | 0.24245 | 0.45917 | ko05220    | ENSG00000105647                                                                 | K02649                             |
| Fc epsilon RI signaling pathway                            | 1            | 72              | 0.24845 | 0.45917 | ko04664    | ENSG00000105647                                                                 | K02649                             |
| TGF-beta signaling pathway                                 | 1            | 73              | 0.25144 | 0.45917 | ko04350    | ENSG00000122641                                                                 | K04667                             |
| Pertussis                                                  | 1            | 75              | 0.25737 | 0.45917 | ko05133    | ENSG00000163735                                                                 | K05506                             |
| Arrhythmogenic right ventricular cardiomyopathy (ARVC)     | 1            | 79              | 0.2691  | 0.45917 | ko05412    | ENSG00000182389                                                                 | K04865                             |
| Phosphatidylinositol signaling system                      | 1            | 80              | 0.27201 | 0.45917 | ko04070    | ENSG00000105647                                                                 | K02649                             |
| Staphylococcus aureus infection                            | 1            | 81              | 0.2749  | 0.45917 | ko05150    | ENSG00000186395                                                                 | K07604                             |
| ErbB signaling pathway                                     | 1            | 82              | 0.27778 | 0.45917 | ko04012    | ENSG00000105647                                                                 | K02649                             |
| Gastric acid secretion                                     | 1            | 83              | 0.28065 | 0.45917 | ko04971    | ENSG00000107159                                                                 | K01672                             |
| B cell receptor signaling pathway                          | 1            | 83              | 0.28065 | 0.45917 | ko04662    | ENSG00000105647                                                                 | K02649                             |
| Small cell lung cancer                                     | 1            | 85              | 0.28636 | 0.45917 | ko05222    | ENSG00000105647                                                                 | K02649                             |
| Apoptosis                                                  | 1            | 85              | 0.28636 | 0.45917 | ko04210    | ENSG00000105647                                                                 | K02649                             |
| Salivary secretion                                         | 1            | 87              | 0.29202 | 0.45917 | ko04970    | ENSG00000156113                                                                 | K04936                             |
| Progesterone-mediated oocyte maturation                    | 1            | 88              | 0.29483 | 0.45917 | ko04914    | ENSG00000105647                                                                 | K02649                             |
| Cardiac muscle contraction                                 | 1            | 88              | 0.29483 | 0.45917 | ko04260    | ENSG00000182389                                                                 | K04865                             |
| NF-kappa B signaling pathway                               | 1            | 97              | 0.31968 | 0.47118 | ko04064    | ENSG00000163739                                                                 | K05505                             |
| Fc gamma R-mediated phagocytosis                           | 1            | 97              | 0.31968 | 0.47118 | ko04666    | ENSG00000105647                                                                 | K02649                             |
| Hypertrophic cardiomyopathy (HCM)                          | 1            | 98              | 0.32238 | 0.47118 | ko05410    | ENSG00000182389                                                                 | K04865                             |
| Bile secretion                                             | 1            | 98              | 0.32238 | 0.47118 | ko04976    | ENSG00000107159                                                                 | K01672                             |
| T cell receptor signaling pathway                          | 1            | 104             | 0.33841 | 0.47588 | ko04660    | ENSG00000105647                                                                 | K02649                             |
| Dilated cardiomyopathy                                     | 1            | 104             | 0.33841 | 0.47588 | ko05414    | ENSG00000182389                                                                 | K04865                             |
| Prostate cancer                                            | 1            | 105             | 0.34104 | 0.47588 | ko05215    | ENSG00000105647                                                                 | K02649                             |
| Cholinergic synapse                                        | 1            | 109             | 0.35147 | 0.47588 | ko04725    | ENSG00000105647                                                                 | K02649                             |
| Vascular smooth muscle contraction                         | 1            | 114             | 0.36429 | 0.47588 | ko04270    | ENSG00000156113                                                                 | K04936                             |
| Leukocyte transendothelial migration                       | 1            | 114             | 0.36429 | 0.47588 | ko04670    | ENSG00000105647                                                                 | K02649                             |
| Glutamatergic synapse                                      | 1            | 115             | 0.36682 | 0.47588 | ko04724    | ENSG00000144935                                                                 | K04964                             |
| Serotonergic synapse                                       | 1            | 117             | 0.37186 | 0.47588 | ko04726    | ENSG00000144935                                                                 | K04964                             |
| Neurotrophin signaling pathway                             | 1            | 117             | 0.37186 | 0.47588 | ko04722    | ENSG00000105647                                                                 | K02649                             |
| Oxidative phosphorylation                                  | 1            | 120             | 0.37934 | 0.47588 | ko00190    | ENSG00000259112                                                                 | K03968                             |
| Axon guidance                                              | 1            | 122             | 0.38428 | 0.47588 | ko04360    | ENSG00000167680                                                                 | K06842                             |
| Toxoplasmosis                                              | 1            | 129             | 0.40126 | 0.47588 | ko05145    | ENSG00000105647                                                                 | K02649                             |
| Osteoclast differentiation                                 | 1            | 129             | 0.40126 | 0.47588 | ko04380    | ENSG00000105647                                                                 | K02649                             |
| Hepatitis C                                                | 1            | 130             | 0.40365 | 0.47588 | ko05160    | ENSG00000105647                                                                 | K02649                             |
| Cell adhesion molecules (CAMs)                             | 1            | 132             | 0.4084  | 0.47588 | ko04514    | ENSG00000088827                                                                 | K06548                             |
| Natural killer cell mediated cytotoxicity                  | 1            | 132             | 0.4084  | 0.47588 | ko04650    | ENSG00000105647                                                                 | K02649                             |
| Insulin signaling pathway                                  | 1            | 133             | 0.41076 | 0.47588 | ko04910    | ENSG00000105647                                                                 | K02649                             |
| Ubiquitin mediated proteolysis                             | 1            | 137             | 0.42011 | 0.48085 | ko04120    | ENSG00000185345                                                                 | K04556                             |
| Jak-STAT signaling pathway                                 | 1            | 156             | 0.46258 | 0.52315 | ko04630    | ENSG00000105647                                                                 | K02649                             |
| Alzheimer's disease                                        | 1            | 162             | 0.47534 | 0.52971 | ko05010    | ENSG00000259112                                                                 | K03968                             |
| Protein processing in endoplasmic reticulum                | 1            | 164             | 0.47953 | 0.52971 | ko04141    | ENSG00000185345                                                                 | K04556                             |
| Tuberculosis                                               | 1            | 176             | 0.50399 | 0.55033 | ko05152    | ENSG00000111012                                                                 | K07438                             |
| Herpes simplex infection                                   | 1            | 183             | 0.51773 | 0.55891 | ko05168    | ENSG00000108691                                                                 | K14624                             |
| Focal adhesion                                             | 1            | 187             | 0.52541 | 0.56083 | ko04510    | ENSG00000105647                                                                 | K02649                             |
| Huntington's disease                                       | 1            | 193             | 0.53671 | 0.56418 | ko05016    | ENSG00000259112                                                                 | K03968                             |
| Epstein-Barr virus infection                               | 1            | 195             | 0.54042 | 0.56418 | ko05169    | ENSG00000105647                                                                 | K02649                             |
| MAPK signaling pathway                                     | 1            | 247             | 0.62726 | 0.64771 | ko04010    | ENSG00000182389                                                                 | K04865                             |
| HTLV-I infection                                           | 1            | 255             | 0.6391  | 0.65285 | ko05166    | ENSG00000105647                                                                 | K02649                             |
| Pathways in cancer                                         | 1            | 337             | 0.74114 | 0.74902 | ko05200    | ENSG00000105647                                                                 | K02649                             |
| Metabolic pathways                                         | 3            | 1125            | 0.83351 | 0.83351 | ko01100    | ENSG00000259112;ENSG00000131471;ENSG00000111012                                 | K03968+K00276+K07438               |

**Figure S1****A**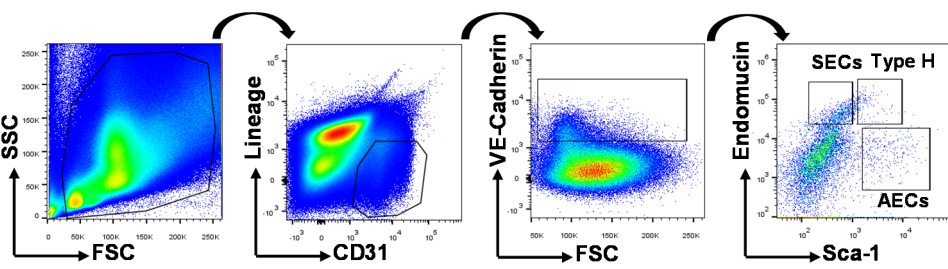**B**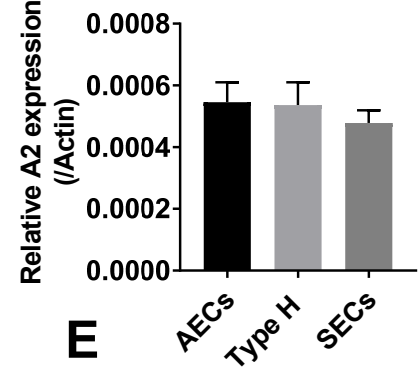**C**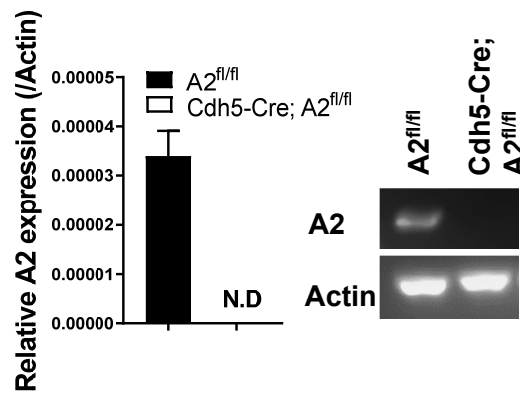**D**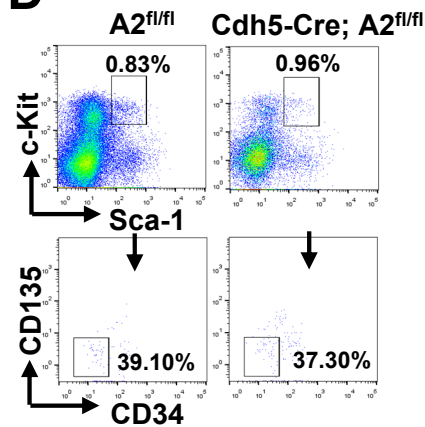**E**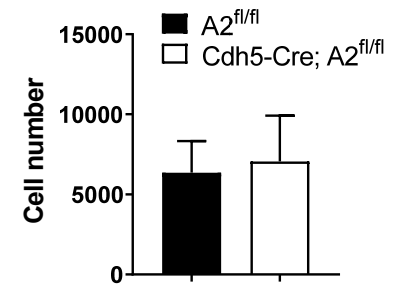**F**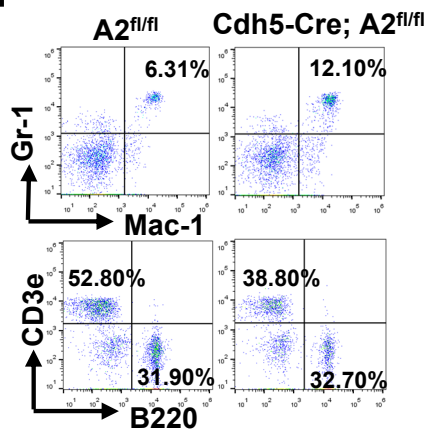**G**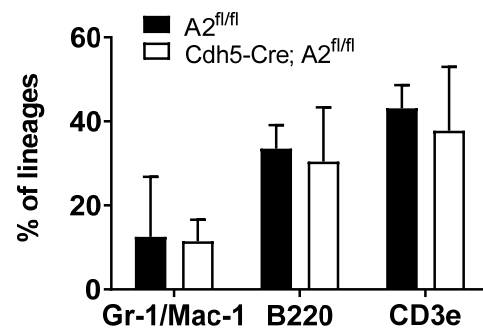**H**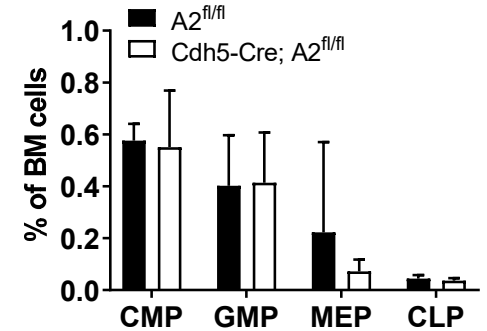**I**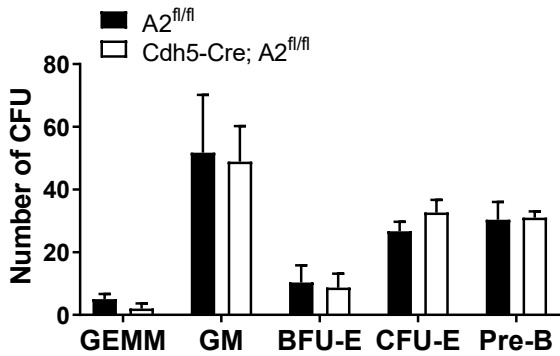**J**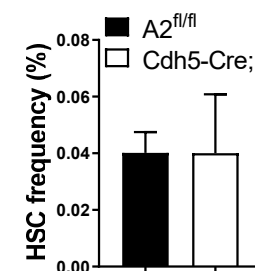**K**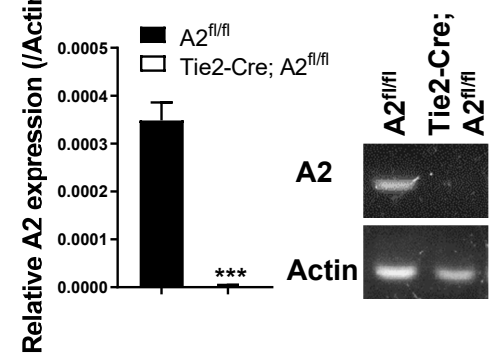**L**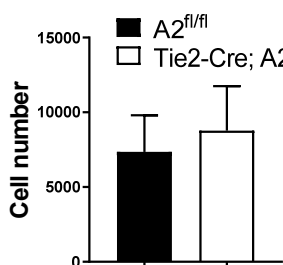**M**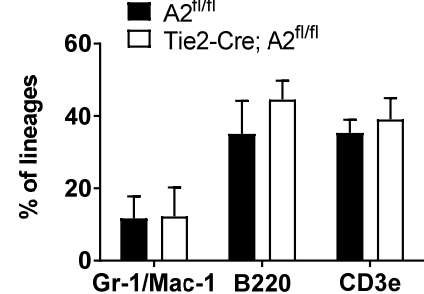**N**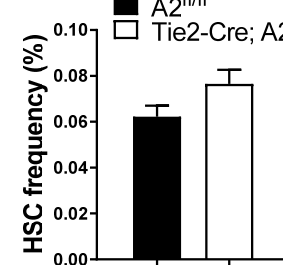**O**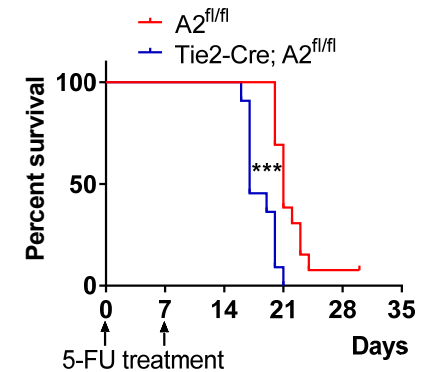

**Figure S1, related to Figure 1. ANGPTL2 is highly expressed in endothelial cells and important for HSC stemness maintenance.** (A) The flow cytometric sorting strategy for the indicated endothelial cell subtypes in BM, including sinusoidal ECs (SECs, Lin<sup>-</sup>CD31<sup>+</sup>VE-cad<sup>+</sup>EMCN<sup>+</sup>Sca1<sup>lo</sup>), type H vessels (Lin<sup>-</sup>CD31<sup>+</sup>VE-cad<sup>+</sup>EMCN<sup>hi</sup>Sca1<sup>+</sup>) and arterioles (Lin<sup>-</sup>CD31<sup>+</sup>VE-cad<sup>+</sup>EMCN<sup>-</sup>Sca1<sup>+</sup>). (B) The *Angptl2* mRNA expression level in the subtypes of the endothelial cells in BM. (C) The deletion efficiency of *Angptl2* in endothelial cells from *Cdh5-Cre; Angptl2<sup>fl/fl</sup>* mice was measured by quantitative RT-PCR (left, n=3; ND, not detectable), and a representative electrophoretic image is shown (right). (D) Representative flow cytometric analyses of the frequencies of immunophenotypic Lin<sup>-</sup>Sca-1<sup>+</sup>c-Kit<sup>+</sup>CD34<sup>-</sup>CD135<sup>-</sup>LT-HSCs from *Angptl2<sup>fl/fl</sup>* and *Cdh5-Cre; Angptl2<sup>fl/fl</sup>* mice. (E) The absolute number of LT-HSCs in BM in *Cdh5-Cre; Angptl2<sup>fl/fl</sup>* and *Angptl2<sup>fl/fl</sup>* control mice. (F-G) Representative flow cytometric analyses and quantification data of the multilineage cells in peripheral blood from *Angptl2<sup>fl/fl</sup>* and *Cdh5-Cre; Angptl2<sup>fl/fl</sup>* mice (n=3). (H) The cell frequencies of common myeloid progenitors (CMPs), granulocyte-monocyte progenitors (GMPs), megakaryocyte-erythroid progenitors (MEPs) and lymphoid progenitors (CLPs) in the BM of *Angptl2<sup>fl/fl</sup>* and *Cdh5-Cre; Angptl2<sup>fl/fl</sup>* mice (n=5). (I) The colony forming abilities were measured with total BM cells from *Angptl2<sup>fl/fl</sup>* and *Cdh5-Cre; Angptl2<sup>fl/fl</sup>* mice, and the colony numbers of CFU-GEMM, CFU-GM, BFU-E, CFU-E and pre-B colonies are shown (n=3~9). (J) The frequencies of LT-HSCs in *Angptl2<sup>fl/fl</sup>* or *Cdh5-Cre; Angptl2<sup>fl/fl</sup>* recipient mice receiving CD45.1 BM cells 6 months after transplantation. (K) The deletion efficiency of *Angptl2* in endothelial cells from *Tie2-Cre; Angptl2<sup>fl/fl</sup>* mice was measured by quantitative RT-PCR (left, n=3), and a representative electrophoretic image is shown (right). (L) The absolute number of HSCs in BM in *Tie2-Cre; Angptl2<sup>fl/fl</sup>* and *Angptl2<sup>fl/fl</sup>* control mice. (M) Quantification data of the multilineage cells in peripheral blood from *Angptl2<sup>fl/fl</sup>* and *Tie2-Cre; Angptl2<sup>fl/fl</sup>* mice (n=3) (\*\*\*)  $p < 0.001$ . (N) The frequencies of LT-HSCs in *Angptl2<sup>fl/fl</sup>* or *Tie2-Cre; Angptl2<sup>fl/fl</sup>* recipient mice receiving CD45.1 BM cells 6 months after transplantation. (O) *Angptl2<sup>fl/fl</sup>* and *Tie2-Cre; Angptl2<sup>fl/fl</sup>* mice were treated with 5-FU and overall survival was analyzed (n=8, log-rank test, \*\*\*)  $p < 0.001$ .

# Figure S2

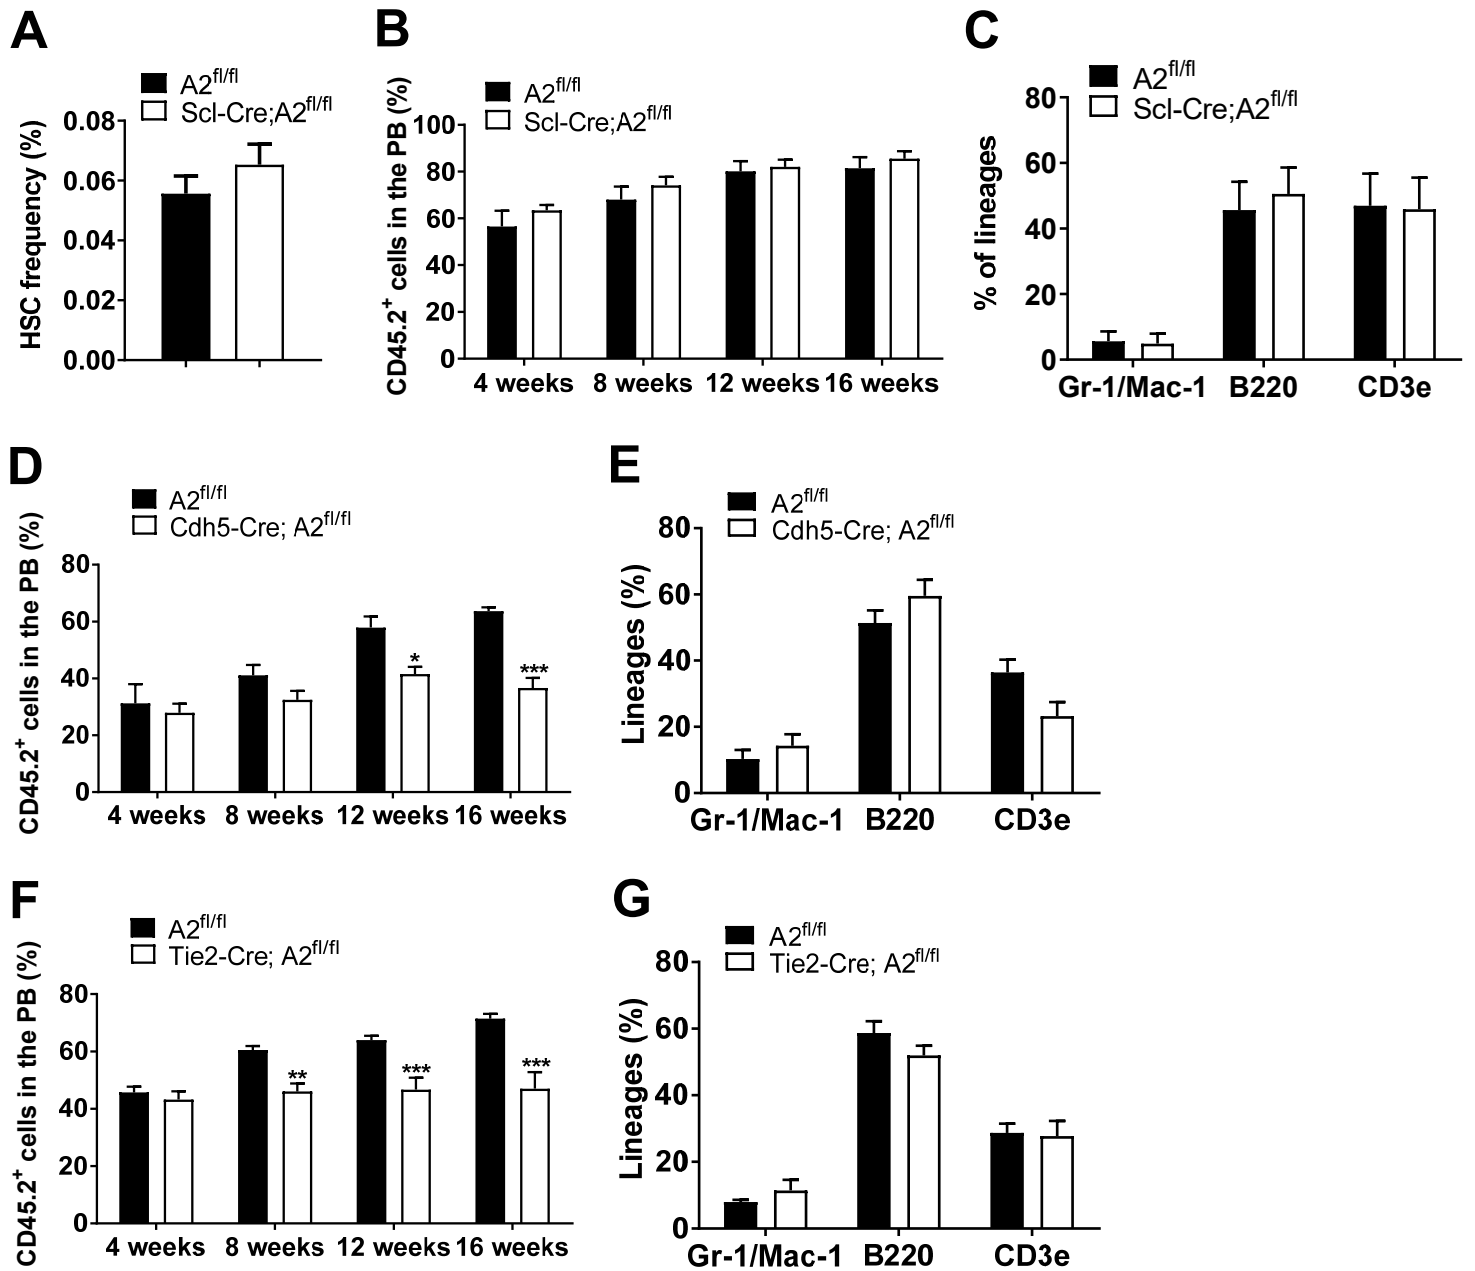



**Figure S2, related to Figure 2. ANGPTL2 derived from other niche cells or HSCs has no effect on HSC activities.** (A) The frequencies of LT-HSCs in *Angptl2<sup>fl/fl</sup>* and *SCL-Cre-ERT; Angptl2<sup>fl/fl</sup>* mice was determined 3 weeks after tamoxifen treatment (n=3). (B) BM CD45.2 cells from *Angptl2<sup>fl/fl</sup>* or *SCL-Cre-ERT; Angptl2<sup>fl/fl</sup>* (pretreated with tamoxifen for 3 weeks) along with CD45.1 competitor cells were injected into lethally irradiated CD45.1 recipient mice. Repopulation was analyzed at 4, 8, 12 and 16 weeks after transplantation (n=5). (C) Multilineage contribution of donor cells in the primary recipients in panel B) at 16 weeks post-transplantation (n=5). (D-G) The repopulation abilities of donor LT-HSCs isolated from *Angptl2<sup>fl/fl</sup>, Cdh5-Cre; Angptl2<sup>fl/fl</sup>* (D) or *Tie2-Cre; Angptl2<sup>fl/fl</sup>* (F) mice was determined by flow cytometric analyses at the indicated time points. The multilineage contribution of donor cells in peripheral blood was quantified at 16 weeks after transplantation (E and G, n=5). (\* $p < 0.05$ ; \*\* $p < 0.01$ ; \*\*\* $p < 0.001$ ).

**Figure S3**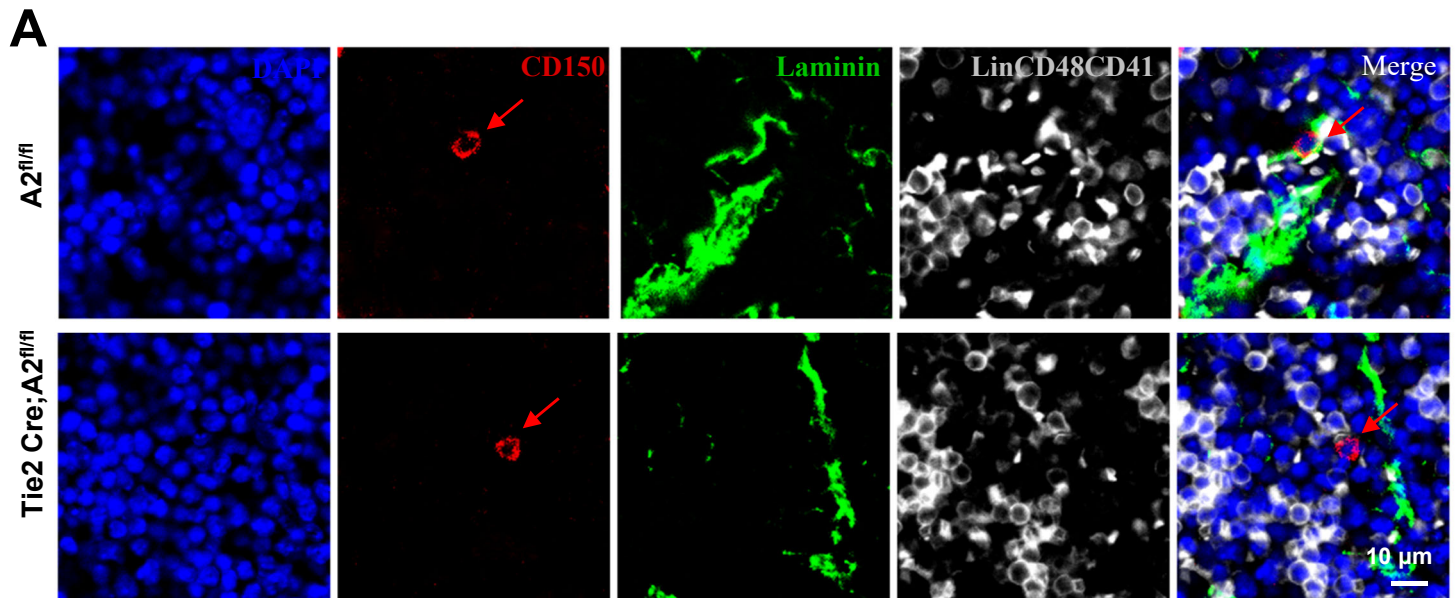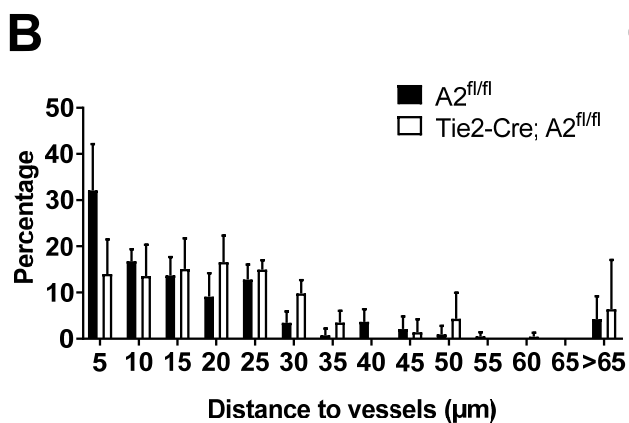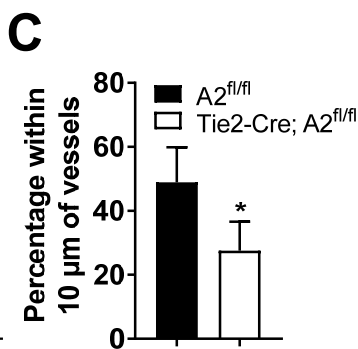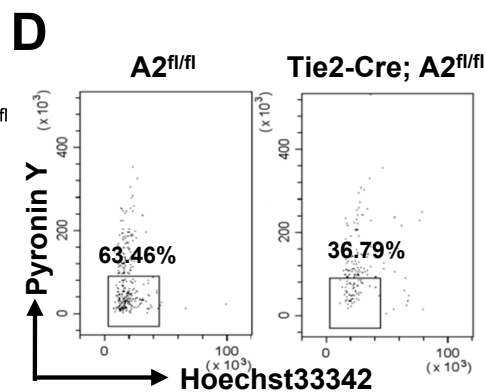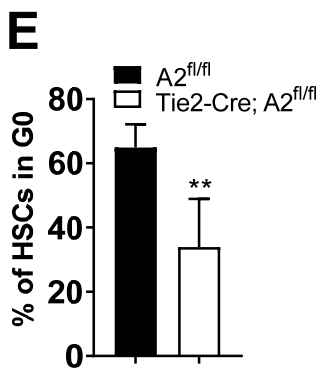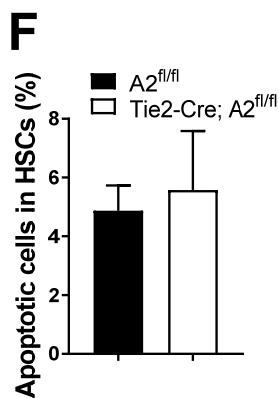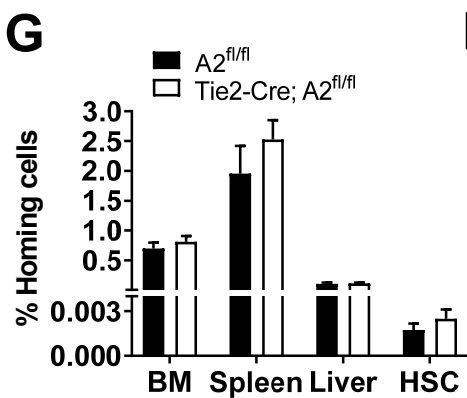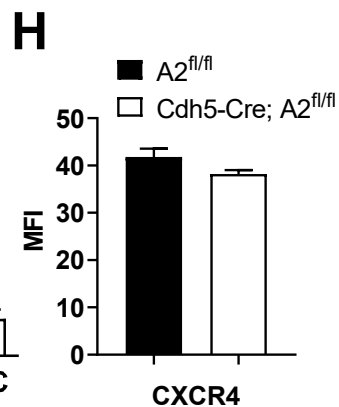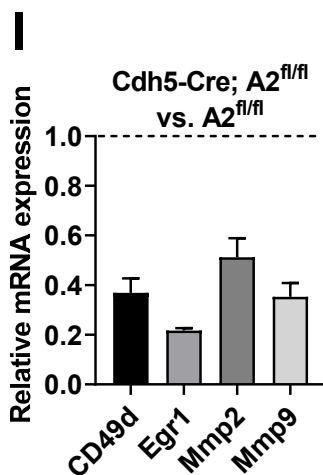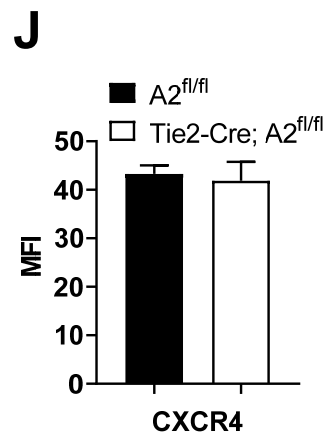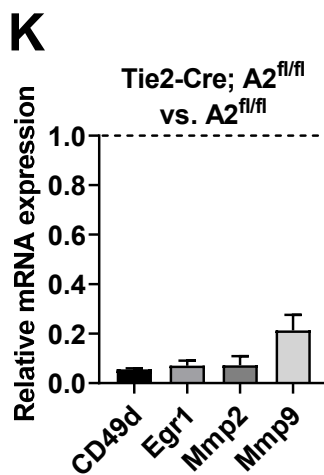

**Figure S3, related to Figure 3. ANGPTL2-producing endothelium supports the localization of HSCs in BM niches.** (A) Representative images of the localization of LT-HSCs in the BM of *Angptl2<sup>fl/fl</sup>* or *Tie2-Cre; Angptl2<sup>fl/fl</sup>* mice. BM sections were stained to reveal Lin<sup>-</sup>CD150<sup>+</sup>CD48<sup>-</sup>CD41<sup>-</sup> LT-HSCs (red, with arrowhead), laminin<sup>+</sup> vessels (green) and Lin<sup>+</sup>CD41<sup>+</sup>CD48<sup>+</sup> differentiated hematopoietic cells (gray). Scale bar, 10  $\mu$ m. (B) Quantification of the frequencies of LT-HSCs localized at the indicated distance to vessels. n=134~142 cells/group. (C) The percentages of LT-HSCs in the BM of *Angptl2<sup>fl/fl</sup>* and *Tie2-Cre; Angptl2<sup>fl/fl</sup>* mice adjacent to laminin<sup>+</sup> endothelial cells (within 10  $\mu$ m) are shown. A total of 134~142 LT-HSCs were counted (n=4). (D-E) The cell cycle status of LT-HSCs from *Angptl2<sup>fl/fl</sup>* and *Tie2-Cre; Angptl2<sup>fl/fl</sup>* mice was determined by staining with Hoechst 33342 and pyronin Y (D). The percentages of the G0 fraction in panel D are shown in E (n=4). (F) The apoptotic status of LT-HSCs from *Angptl2<sup>fl/fl</sup>* or *Tie2-Cre; Angptl2<sup>fl/fl</sup>* mice was measured by using Annexin V and 7-AAD staining (n=4). (G) BM cells from *Angptl2<sup>fl/fl</sup>* and *Tie2-Cre; Angptl2<sup>fl/fl</sup>* mice were labeled with CFSE and transplanted into lethally irradiated recipient mice. The percentage of CFSE<sup>+</sup> cells in the BM, spleen and liver or CFSE<sup>+</sup> LSK cells in the BM was determined by flow cytometric analysis 16 hr later (n=5). (H) The CXCR4 protein levels in LT-HSCs purified from *Angptl2<sup>fl/fl</sup>* or *Cdh5-Cre; Angptl2<sup>fl/fl</sup>* was confirmed by flow cytometric analysis (n=3). (I) The mRNA expression levels of *CD49d*, *Egr1*, *Mmp2*, *Mmp9* in LT-HSCs isolated from *Angptl2<sup>fl/fl</sup>* or *Cdh5-Cre; Angptl2<sup>fl/fl</sup>* were determined by quantitative RT-PCR (n=3). (J) The CXCR4 protein levels in LT-HSCs purified from *Angptl2<sup>fl/fl</sup>* or *Tie2-Cre; Angptl2<sup>fl/fl</sup>* was confirmed by flow cytometric analysis (n=3). (K) The mRNA expression levels of *CD49d*, *Egr1*, *Mmp2*, *Mmp9* in LT-HSCs isolated from *Angptl2<sup>fl/fl</sup>* or *Tie2-Cre; Angptl2<sup>fl/fl</sup>* were determined by quantitative RT-PCR (n=3). (\**p* < 0.05; \*\**p* < 0.01).

# Figure S4

## A

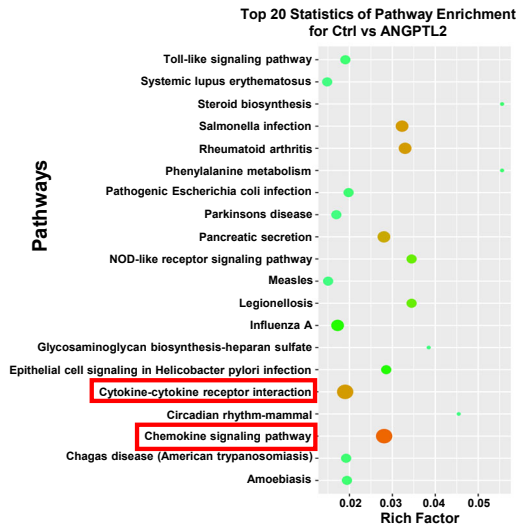

## B

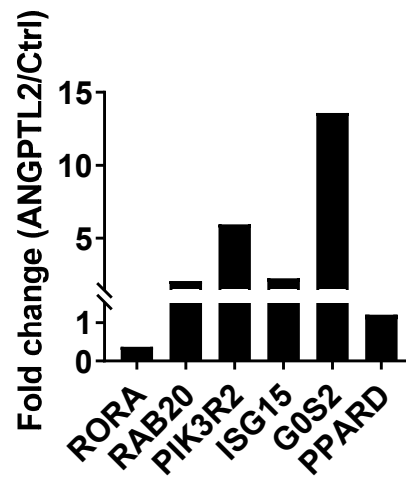

## C

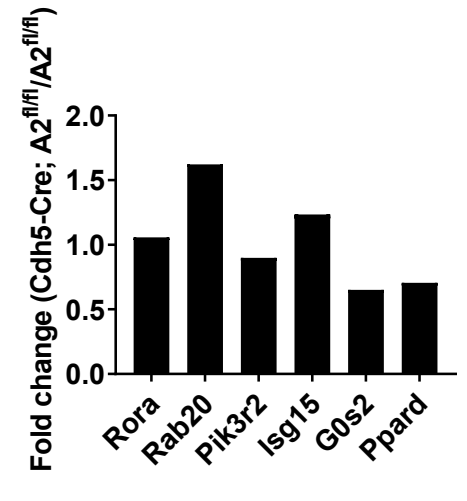

## D

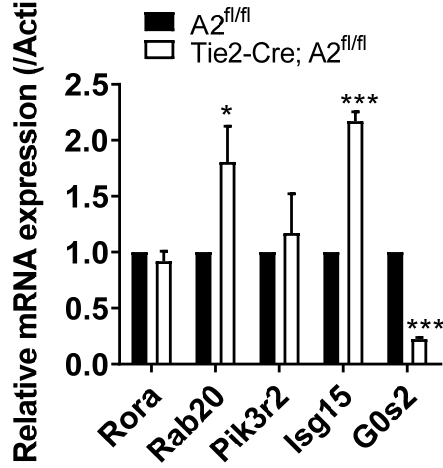

## E

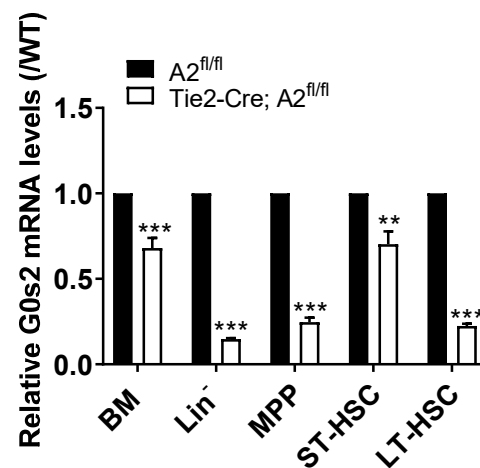

## F

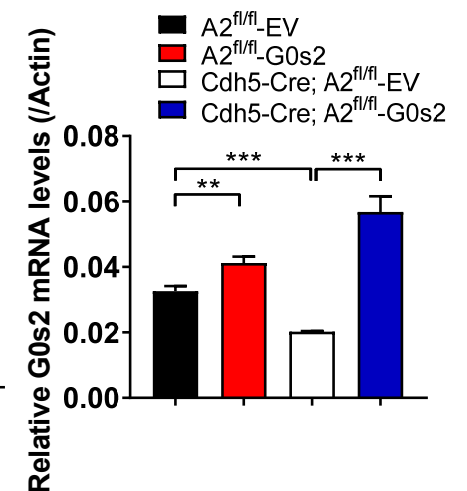

## G

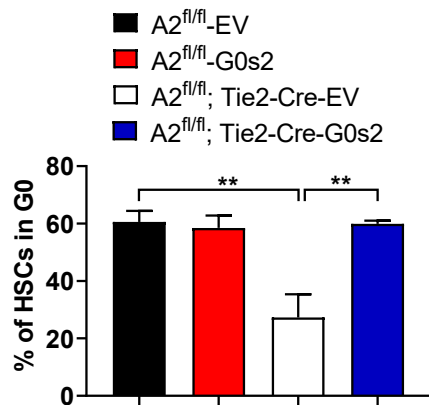

## H

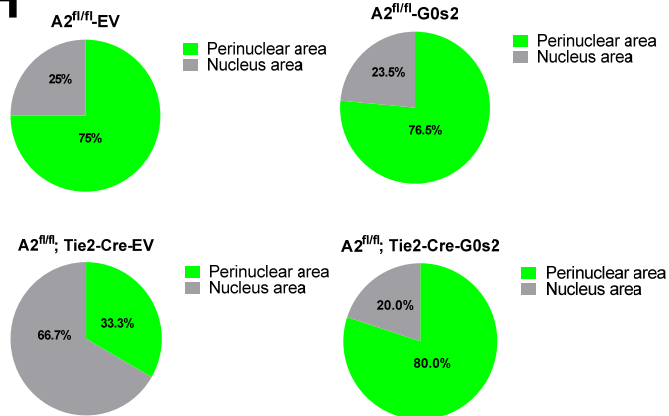

**Figure S4, related to Figure 4. ANGPTL2 supports HSC function by sustaining the level of G0S2.** (A-B) Pathway changes in CD34<sup>+</sup> human cord blood cells upon treatment with the ANGPTL2 protein as evaluated by RNA-sequencing analyses (A). Potential candidates (*RORA*, *RAB20*, *PIK3R2*, *ISG15* *G0S2* and *PPARD*) for the ANGPTL2-mediated downstream pathway in panel A are shown (B). (C) The changes of potential candidates (*Rora*, *Rab20*, *Pik3r2*, *Isg15*, *G0s2* and *Ppard*) in LT-HSCs from *Cdh5-Cre; Angptl2<sup>fl/fl</sup>* and *Angptl2<sup>fl/fl</sup>* mice were determined by RNA-sequencing analysis. LT-HSCs from 6 mice in each group were pooled for the analysis due to the limited number of HSCs from each mouse. (D) Relative mRNA expression of potential candidates (*Rora*, *Rab20*, *Pik3r2*, *Isg15* and *G0s2*) in LT-HSCs purified from *Angptl2<sup>fl/fl</sup>* and *Tie2-Cre; Angptl2<sup>fl/fl</sup>* mice as measured by quantitative RT-PCR (n=3). (E) Relative mRNA expression of *G0s2* in total BM cells, Lin<sup>-</sup> cells, MPPs, ST-HSCs and LT-HSCs from *Angptl2<sup>fl/fl</sup>* and *Tie2-Cre; Angptl2<sup>fl/fl</sup>* mice as measured by quantitative RT-PCR (n=3). (F) *G0s2* levels in BM GFP<sup>+</sup> donor cells from *Angptl2<sup>fl/fl</sup>* and *Cdh5-Cre; Angptl2<sup>fl/fl</sup>* mice with or without *G0s2* overexpression were determined by quantitative RT-PCR (n=3). (G) The cell cycle status of LT-HSCs from *Angptl2<sup>fl/fl</sup>* and *Tie2-Cre; Angptl2<sup>fl/fl</sup>* mice with/without *G0s2* overexpression was determined by staining with Hoechst 33342 and pyronin Y. The percentages of the G0 fraction are shown in G (n=3). (H) Nucleolin localization in LT-HSCs from *Angptl2<sup>fl/fl</sup>* and *Tie2-Cre; Angptl2<sup>fl/fl</sup>* mice with/without *G0s2* overexpression was examined by immunofluorescence staining. A total of 15-24 LT-HSCs were analyzed (\**p* < 0.05; \*\**p* < 0.01; \*\*\**p* < 0.001).

**Figure S5**

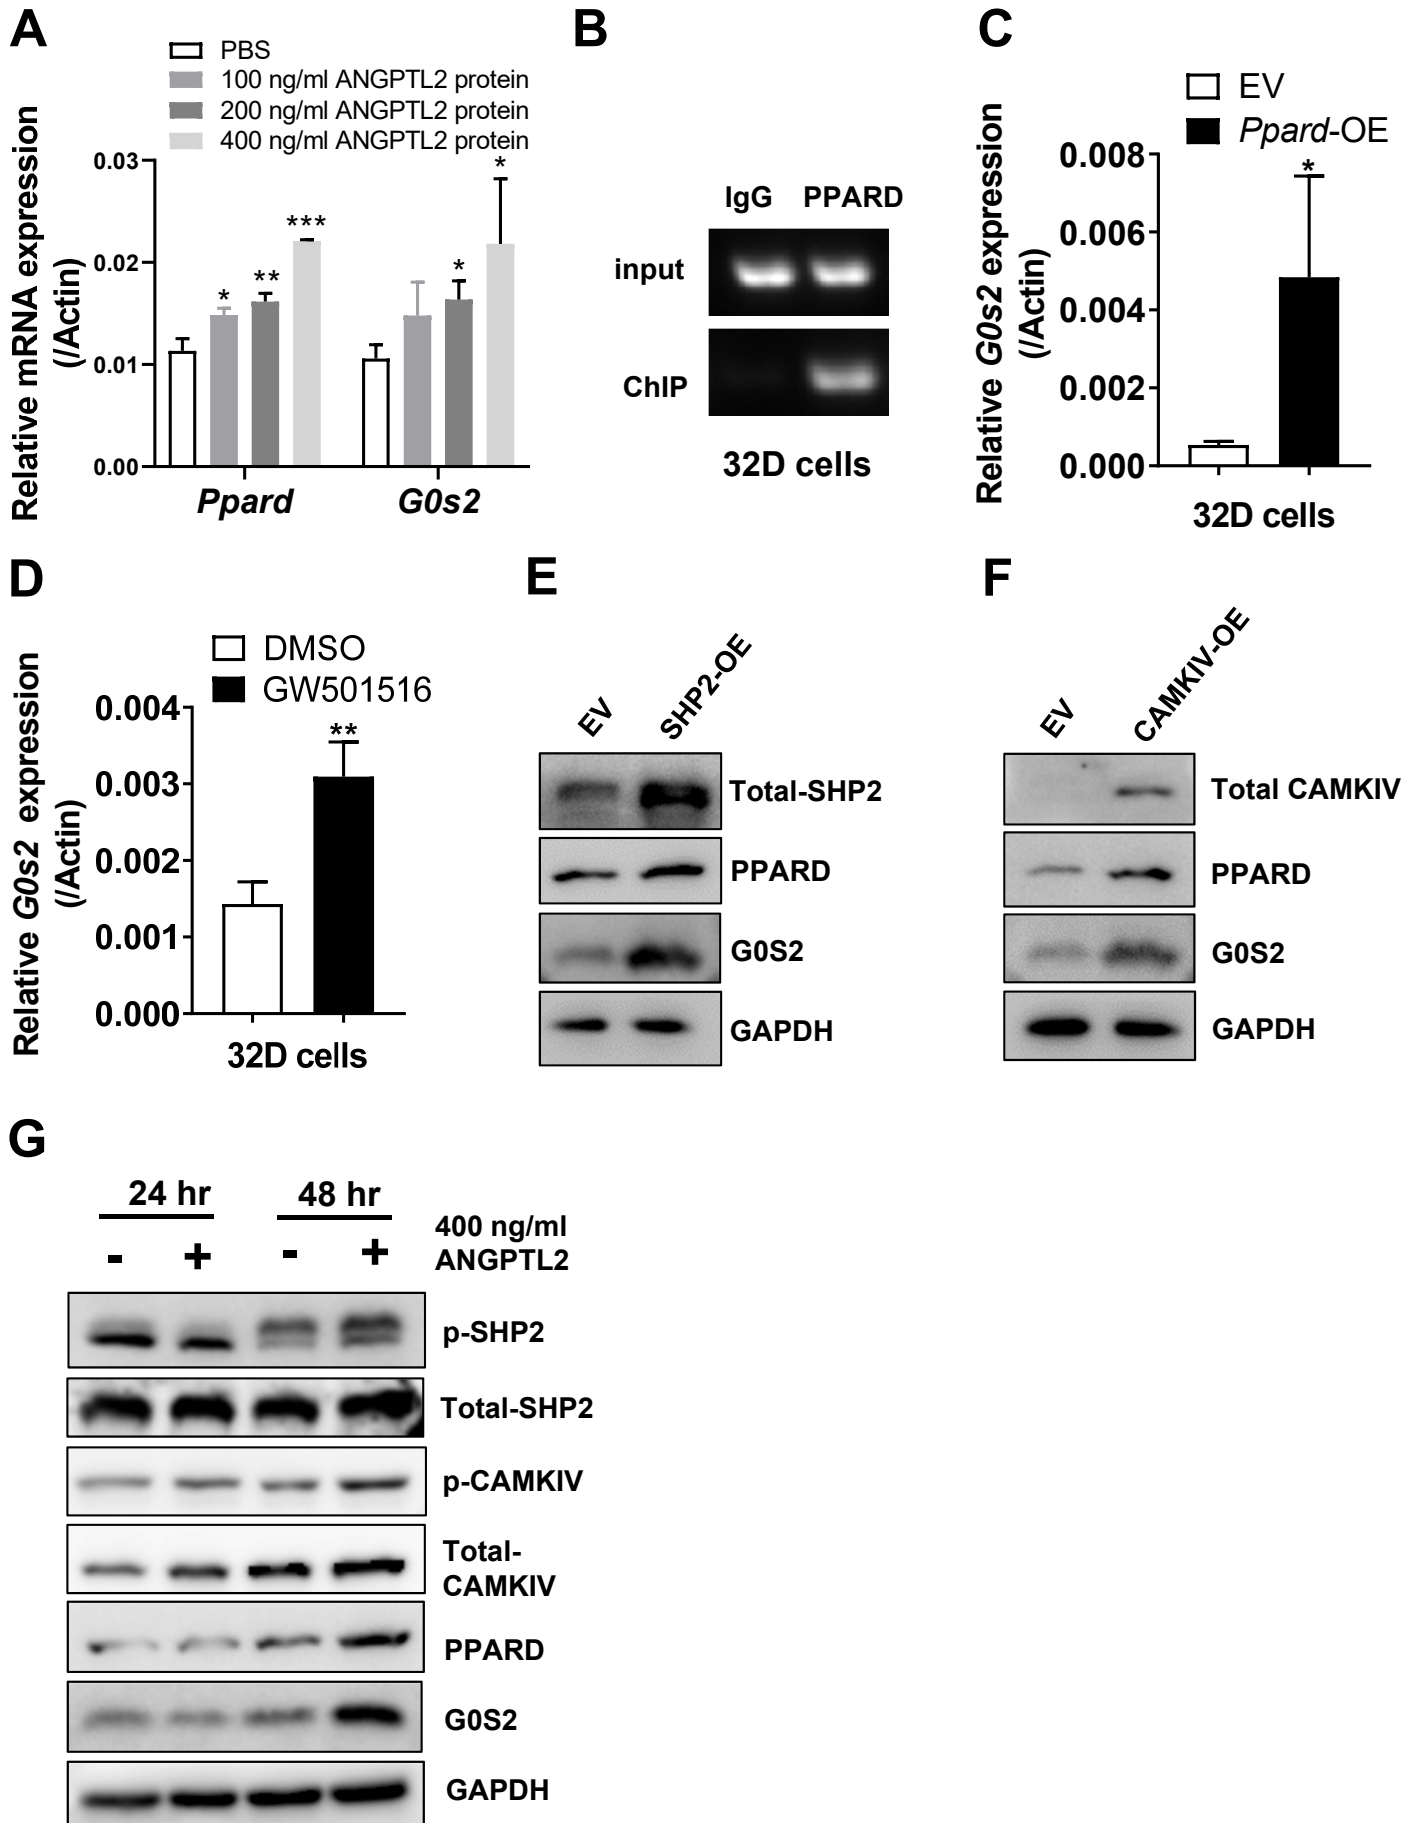

**Figure S5, related to Figure 5. ANGPTL2 sustains the level of G0S2 via the PPARD pathway.** (A) The *Ppard* and *G0s2* mRNA expression level were determined in LT-HSCs after treatment with different doses of ANGPTL2 protein (100, 200, and 400 ng/mL) for 36 hr by quantitative RT-PCR (n=3). (B) Chromatin immunoprecipitation (ChIP) assays were performed in 32D cells. The *G0s2* promoter regions bound to endogenous PPARD were measured by PCR. (C) The *G0s2* mRNA levels in *Ppard*-overexpressing (*Ppard*-OE) 32D cells were detected by quantitative RT-PCR (n=3). (D) The *G0s2* mRNA expression levels were measured in 32D cells upon the treatment with PPARD agonist (GW501516) for 24 hr by quantitative RT-PCR (n=3). (E) The protein levels of SHP2, PPARD and G0S2 in SHP2-overexpressing (*SHP2*-OE) Lin<sup>-</sup> BM cells were evaluated by immunoblot analysis. (F) The protein levels of CAMKIV, PPARD and G0S2 in CAMKIV-overexpressing (*CAMKIV*-OE) Lin<sup>-</sup> BM cells were measured by immunoblot analysis. (G) The protein levels of total-SHP2, p-SHP2, total-CAMKIV, p-CAMKIV, PPARD and G0S2 was determined in Lin<sup>-</sup> BM cells at 24 and 48 hr after treatment with ANGPTL2 protein by immunoblot analysis.

## Supplemental methods

### Flow cytometry

BM cells were freshly isolated from 8- to 10-week-old mice and subjected to further flow cytometric analysis. Immunophenotypic Lin<sup>-</sup>Sca-1<sup>+</sup>c-Kit<sup>+</sup>Flk2<sup>-</sup>CD34<sup>-</sup> LT-HSCs, Lin<sup>-</sup>Sca-1<sup>+</sup>c-Kit<sup>+</sup>Flk2<sup>-</sup>CD34<sup>+</sup> ST-HSCs, and myeloid and lymphoid progenitor cells (Lin<sup>-</sup>Sca-1<sup>low</sup>c-Kit<sup>low</sup>CD16/32<sup>+</sup>Flk2<sup>+</sup> CLPs, Lin<sup>-</sup>Sca-1<sup>-</sup>c-Kit<sup>+</sup>CD16/32<sup>-</sup>CD34<sup>+</sup> CMPs, Lin<sup>-</sup>Sca-1<sup>-</sup>c-Kit<sup>+</sup>CD16/32<sup>+</sup>CD34<sup>+</sup> GMPs, Lin<sup>-</sup>Sca-1<sup>-</sup>c-Kit<sup>+</sup>CD16/32<sup>-</sup>CD34<sup>-</sup> MEPs, and Lin<sup>-</sup>Sca-1<sup>+</sup>c-Kit<sup>+</sup>Flk2<sup>+</sup>CD34<sup>+</sup> MPPs) were evaluated or FACS-purified by staining with a biotinylated lineage cocktail (anti-CD3, anti-CD5, anti-B220, anti-Mac-1, anti-Gr-1, and anti-Ter119; BD Pharmingen), followed by incubation with streptavidin-PE/Cy5.5, anti-Sca-1-FITC, anti-c-Kit-APC, anti-Flk-2-PE, anti-Flk-2-eFluo450, anti-CD34-PE, and anti-CD16/32-eFluo450 (eBioscience). Differentiated hematopoietic cells, including Mac1<sup>+</sup>F4/80<sup>+</sup> Macrophages, CD71<sup>+</sup> erythroid cells, B220<sup>+</sup> B cells, CD3e<sup>+</sup> T cells, were stained (all these antibodies were purchased from eBioscience) and sorted for the measurement of *Angptl2* expression as well. For the analysis of the repopulation ability of HSCs, peripheral blood of recipient mice was collected, followed by lysis of red blood cells and staining with anti-CD45.2-FITC, anti-CD45.1-PE, anti-CD3e-APC (for T-lymphoid lineage), anti-B220-PE (for B-lymphoid lineage), anti-Mac-1-APC, or anti-Gr-1-PE monoclonal antibodies (eBioscience; cells costained with anti-Mac-1 and anti-Gr-1 were deemed to be of the myeloid lineage). Cell cycle or apoptotic status was measured in purified Lin<sup>-</sup>Sca-1<sup>+</sup>c-Kit<sup>+</sup>Flk2<sup>-</sup>CD34<sup>-</sup> LT-HSCs with Hoechst 33342/pyronin Y or anti-annexin V-PE/7-AAD (BD Pharmingen), respectively, as previously described.

### Rescue experiment with G0s2 overexpression in HSCs

The XZ201-*G0s2*-GFP-expressing plasmid (or empty vector) and packaging plasmid pCL-ECO (2:1) were transfected into 293T cells. The supernatant was collected at 48-72 hr after transfection. Lin<sup>-</sup> BM cells isolated from *Angptl2<sup>fl/fl</sup>* and *Cdh5-Cre; Angptl2<sup>fl/fl</sup>* mice were infected by retrovirus with 4 µg/mL polybrene and centrifuged at 800 g for 2 hr, followed by culturing in StemSpan serum-free medium (StemCell Technologies) supplemented with 10 µg/ml heparin (Sigma-Aldrich), 10 ng/ml mouse



SCF (Peprotech), and 20 ng/ml mouse TPO (Peprotech) for 24 hr. Another round of infection was performed before transplantation.

### **Homing assay**

A total of  $2 \times 10^7$  BM cells were freshly isolated from *Angptl2<sup>fl/fl</sup>* and *Cdh5-Cre; Angptl2<sup>fl/fl</sup>* or *Tie2-Cre; Angptl2<sup>fl/fl</sup>* mice, labeled with CFSE and injected into lethally irradiated recipient mice. The frequencies of CFSE<sup>+</sup> cells in the BM, spleen, and liver were determined by flow cytometric analysis 16 hr later. When CFSE<sup>+</sup> LSK (Lin<sup>-</sup>Sca-1<sup>+</sup>c-Kit<sup>+</sup>) cells were analyzed, the BM cells were stained with a biotinylated lineage cocktail, followed by incubation with streptavidin-PE/Cy5.5, anti-Sca-1-PE and anti-Kit-APC (eBioscience) before analysis.

### **Immunofluorescence staining**

For immunofluorescence staining of the BM sections, mouse femurs were isolated and fixed in 4% paraformaldehyde at 4°C for 24 hr, followed by decalcification with 0.5 M EDTA (pH 8.0) for another 2 days. The samples were dehydrated in 30% sucrose at room temperature for 30 minutes, embedded in OCT and cryosectioned with a Leica CM3050 cryostat. The BM sections were rehydrated in PBS and permeabilized in 0.5% Triton X-100/PBS solution at room temperature for 15 minutes. The BM sections were then probed with anti-laminin (Abcam), anti-CD150-PE (eBioscience), anti-CD41-APC (Biolegend), anti-CD48-APC (Biolegend) and biotinylated primary antibody cocktail for lineage markers (eBioscience). The BM sections were then washed with PBS and incubated with the appropriate Alexa Fluor-conjugated and streptavidin-APC secondary antibodies at room temperature for 1 hr. Nuclei were counterstained with DAPI before imaging. For the analysis of nucleolin distribution, FACS-purified LT-HSCs were fixed in 4% paraformaldehyde for 10 minutes at room temperature and stained with anti-nucleolin primary antibody (Cell Signaling Technology) at 4°C overnight. Then, the LT-HSCs were incubated with Alexa Fluor 555-conjugated secondary antibody (Thermo Fisher Scientific) for 1 hr, followed by imaging with a Nikon A1 confocal microscope.

### **Colony assays**

A total of  $2 \times 10^4$  BM cells from *Angptl2<sup>fl/fl</sup>* and *Cdh5-Cre;Angptl2<sup>fl/fl</sup>* mice were freshly harvested and seeded in 1.2% methylcellulose IMDM containing 30% fetal bovine serum, 1% bovine serum albumin, 2 mg/mL glutamine, 99  $\mu$ M  $\beta$ -mercaptoethanol, 50 ng/mL SCF, 20 ng/mL IL-3, 20 ng/mL IL-6, 20 ng/mL erythropoietin (for GEMM, GM and BFU-E assays), 50 ng/mL IL7 (for pre-B assay) or 20 ng/mL erythropoietin (for CFU-E assay). The colonies were counted 7-10 days after culture.

### **5-FU challenge**

*Angptl2<sup>fl/fl</sup>* and *Cdh5-Cre; Angptl2<sup>fl/fl</sup>* or *Tie2-Cre; Angptl2<sup>fl/fl</sup>* mice (8 mice for each group) were administered intraperitoneally with 5-fluorouracil (5-FU) at a dose of 150 mg/kg/week for 2 weeks. The overall survival was recorded and analyzed using the log-rank test.

### **Quantitative RT-PCR**

First strand cDNA was reversed transcribed using AMV Reverse Transcriptase (TaKaRa). PCRs were performed according to the manufacturer's protocol (Roche). The experiments were conducted with an Applied Biosystems 7900HT system, and the mRNA levels were normalized to the level of the  $\beta$ -actin RNA transcript. The sequences of the primers used are shown in Table S1.

### **Luciferase reporter assays and chromatin immunoprecipitation analysis**

The luciferase reporter vector pGL4.27 containing the *G0s2* promoter was constructed to evaluate the effect of *Ppard* on the transcriptional activation of *G0s2*. The pLVX-Ppard-GFP or negative control vector plasmid along with the pGL4.27-*G0s2* promoter vector were cotransfected into 32D cells, which is myeloblast-like cell line derived from long term cultures of bone marrow cells. Luciferase activities were measured by using a luciferase reporter system (GloMax® Multi Instrument) at 48 hr after transfection. Luciferase measurements were calculated as firefly luciferase units versus Renilla luciferase units. For chromatin immunoprecipitation analysis,  $1 \times 10^7$  32D cells or Lin<sup>-</sup> BM cells were collected, incubated with the anti-PPARD antibody (ab178866, abcam) measured and evaluated the potential binding to *G0s2* promoter by a ChIP Assay Kit (Beyotime Biotechnology). The DNA levels were measured by PCR using primers for *G0s2* (Table S1).

## Cell culture

Immunophenotypic  $\text{Lin}^- \text{Sca-1}^+ \text{c-Kit}^+ \text{Flk2}^- \text{CD34}^-$  LT-HSCs from WT mice were cultured with StemSpan serum-free medium (StemCell Technologies) supplemented with 10  $\mu\text{g/ml}$  heparin (Sigma-Aldrich), 10 ng/mL mouse SCF (Peprotech), 20 ng/mL mouse TPO (Peprotech) in a U-bottom 96-well plate and treated with different doses of ANGPTL2 protein (100, 200, and 400 ng/mL) for 36 hr, followed by the measurement of mRNA expression levels of *Ppard* and *G0s2* by quantitative RT-PCR. For the treatment of the agonist for PPAR $\alpha$  (GW501516), 32D cells and LT-HSCs were incubated with 1  $\mu\text{M}$  of GW501516 for 24 hr, followed by the detection of *G0s2* expression by quantitative RT-PCR. For *Ppard* overexpression experiment, The XZ201-Ppard-GFP-expressing plasmid (or empty vector) and packaging plasmid pCL-ECO (2:1) were transfected into 293T cells. The supernatant was collected at 48-72 hr after transfection. 32D cells and  $\text{Lin}^-$  BM cells isolated from WT mice were infected by retrovirus with 4  $\mu\text{g/ml}$  polybrene and centrifuged at 800 g for 2 hr, followed by culturing for 48 hr. GFP $^+$  32D cells and  $\text{Lin}^-$  BM cells were sorted by FACS and subjected to total RNA extraction.

## Immunoblot analysis

The XZ201-SHP2-GFP or XZ201-CAMKIV-HA-GFP-expressing plasmid (or empty vector) and packaging plasmid pCL-ECO (2:1) were transfected into 293T cells. The supernatant was collected at 48 hr after transfection.  $\text{Lin}^-$  BM cells isolated from WT mice were infected by retrovirus with 4  $\mu\text{g/ml}$  polybrene and centrifuged at 800 g for 2 hr, followed by culturing in StemSpan serum-free medium (StemCell Technologies) supplemented with 10  $\mu\text{g/ml}$  heparin (Sigma-Aldrich), 10 ng/ml mouse SCF (Peprotech), and 20 ng/ml mouse TPO (Peprotech) for 48 hr. GFP $^+$  cells were sorted and cell lysates were prepared for the immunoblot analysis. In some cases,  $\text{Lin}^-$  BM cells were subjected to the treatment with 400 ng/mL of ANGPTL2 protein for 24-48 hr before the analysis. Proteins were separated by electrophoresed on 10% sodium dodecyl sulfate-polyacrylamide gels and transferred onto polyvinylidene difluoride membranes (Millipore). The membranes were incubated with primary antibodies overnight at 4°C, followed by incubation with appropriate horseradish peroxidase conjugated secondary antibodies. The following antibodies were used for the immunoblot analysis: anti-p-SHP2 (D66F10, CST), anti-SHP2 (CY3636, abways),

anti-CAMKIV (sc-55501, Santa Cruz Biotechnology), anti-p-CAMKIV (CY8012, abways), anti-PPARD (ab178866, abcam), anti-G0S2 (A9970, ABclonal), and anti-HA (PTM-5389, PTM BIO).

### **RNA-Sequencing assay**

Human cord blood CD34<sup>+</sup> cells treated with or without ANGPTL2 protein were sorted for the extraction of total RNA and subjected to RNA sequencing analyses at Vazyme Biotech Co, Ltd (Shanghai, China). The GEO accession number is GSE169107. Lin<sup>-</sup>Sca-1<sup>+</sup>Kit<sup>+</sup>Flk2<sup>-</sup>CD34<sup>-</sup> immunophenotypic HSCs were purified from *Angptl2<sup>fl/fl</sup>* and *Cdh5-Cre; Angptl2<sup>fl/fl</sup>* mice for the RNA-sequencing analysis at Novogene Co, Ltd (Shanghai, China). The GEO accession number is GSE186454.

### **Study approval**

Human cord blood samples were kindly provided by the Sixth People's Hospital, affiliated to Shanghai Jiao Tong University School of Medicine, Shanghai, China. Written informed consent was obtained from the healthy donor, and all the procedures were approved by the Ethics Committee for Medical Research (IRB) at Shanghai Jiao Tong University School of Medicine.
